# Supplementary material for: Spatiotemporal patterns of urban thermal environment and comfort across 180 cities in summer under China’s rapid urbanization
Source: PeerJ. 2019 Aug 2;7:e7424. doi: 10.7717/peerj.7424 (PMC6681799; doi:10.7717/peerj.7424)
Supplement: Data S2 [file peerj-07-7424-s002.xlsx]

## Sheet: 1990
City1990	区域	XX	YY	Area	cover	市区面积_x000D_（平方公里） Urban_x000D_ District_x000D_ Area	市区人口（万人）_x000D_ Urban_x000D_ District_x000D_ Population	城区面积（平方公里）_x000D_ Urban_x000D_ Area	城区人口_x000D_（万人） Urban_x000D_ Population	建成区_x000D_ 面积_x000D_（平方公里） Area of_x000D_ Built_x000D_ District	人口密度	GDP(万元)		人均GDP(万元)	2005	XX	YY	cover	市区面积_x000D_（平方公里） Urban_x000D_ District_x000D_ Area	市区人口（万人）_x000D_ Urban_x000D_ District_x000D_ Population	城区面积（平方公里）_x000D_ Urban_x000D_ Area	城区人口_x000D_（万人） Urban_x000D_ Population	建成区_x000D_ 面积_x000D_（平方公里） Area of_x000D_ Built_x000D_ District	人口密度	GDP(亿元)	人均GDP(万元)		2015	XX	YY	建成区绿化覆盖面积(公顷）	建成区绿化覆盖率	市区面积_x000D_（平方公里） Urban_x000D_ District_x000D_ Area	市区人口（万人）_x000D_ Urban_x000D_ District_x000D_ Population	城区面积（平方公里）_x000D_ Urban_x000D_ Area	城区人口_x000D_（万人） Urban_x000D_ Population	建成区_x000D_ 面积_x000D_（平方公里） Area of_x000D_ Built_x000D_ District	人口密度		GDP(万元)		人均GDP		气候1990	Ta	VP	RH	v	Tmrt
北京	华北	116.407	39.9042	10338	26.0403	4568	640.42		576.96	397	14533	4920524	492.052	7683.28	北京	116.407	39.9042	38.11	16410	1633	12187	1379.9	1289.32	10702.5	6886.3	42169.6		北京	116.407	39.9042	66750	51.1	16410	2114.8	12187	1825.1	1306.45	13969.9	13969.9	192131742	19213.2	90851	90851	北京	25.6	25.6	78.1	1.6	45
天津	华北	117.201	39.0842	1372	4.09552	4276	487.41		457.47	335	13655.8	2787934	278.793	5719.89	天津	117.201	39.0842	36.4	7399	786	2236.12	548.18	571.53	9591.45	3697.6	47043.3		天津	117.201	39.0842	26101	35.4	7398.86	821.7	2334.47	608.15	747.26	8138.4	8138.4	131465527	13146.6	159992		天津	26.3	27	79.1	1.9	45
石家庄	华北	114.515	38.0423	767	9.02353	307	117.13		106.84	85	12569.4	615091	61.5091	5251.35	石家庄	114.515	38.0423	32.8	456	238	212.54	204.08	186.74	10928.6	1786.8	75075.6		石家庄	114.515	38.0423	9308	42.89	455.8	247.9	305.72	233.92	216.5	10804.6	10804.6	17044127	1704.41	68754		石家庄	26.6	27.6	79.4	1.8	45
唐山	华北	118.18	39.6309	1778	15.875	1090	144.72		104.42	112	9323.21	594975	59.4975	4111.21	唐山	118.18	39.6309	43.65	3874	301	1230.2	191.47	209.11	9156.42	2027.6	67362.1		唐山	118.18	39.6309	10245	41.14	3874	304.8	1230.2	193.48	249	7770.28	7770.28	24885900	2488.59	81646.7		唐山	24.9	26	82.7	2.5	45
秦皇岛	华北	119.6	39.9354	1013	17.1695	363	48.6		36.49	59	6184.75	329802	32.9802	6786.05	秦皇岛	119.6	39.9354	42.36	363	81	363.2	80.6	87.48	9213.53	491.2	60642		秦皇岛	119.6	39.9354	5448	56.1	363.2	88.03	363.2	88.03	97.26	9051	9051	6246639	624.664	70960.3		秦皇岛	24	25.4	85.3	2.9	45
邢台	华北	114.505	37.0706	289	12.5652	132	31.58		30.28	23	13165.2	160136	16.0136	5070.8	邢台	114.505	37.0706	32.51	132	59	114.8	58.2	70	8314.29	680.8	115390		邢台	114.505	37.0706	2956	37.42	132.3	86.8	114.8	86.8	79.21	10958.2	10958.2	2632869	263.287	30332.6		邢台	27.1	27.6	77.1	1.6	45
保定	华北	115.465	38.8744	449	8.80392	126	52.86		48.32	51	9474.51	281605	28.1605	5327.37	保定	115.465	38.8744	36.27	312	106	312.3	106.07	103	10298.1	1072.1	101142		保定	115.465	38.8744	5963	41.41	327.04	108.92	327.04	108.92	144.22	7552.35	7552.35	7678669	767.867	70498.2		保定	26.2	27.1	79.8	1.7	45
张家口	华北	114.886	40.7675	605	10.0833	710	56		52.91	60	8818.33	266165	26.6165	4752.95	张家口	114.886	40.7675	33.78	819	89	376.27	81.5	76.82	10609.2	415.8	46719.1		张家口	114.886	40.7675	3565	41.45	819	90.6	376.27	84.8	86	9860.47	9860.47	4454152	445.415	49162.8		张家口	22.8	20.3	73.3	1.7	45
承德	华北	117.963	40.9529	624	34.6667	651	28.05		24.68	18	13711.1	115321	11.5321	4111.27	承德	117.963	40.9529	31.65	939	52	524.75	44.82	80.73	5551.84	360.3	69288.5		承德	117.963	40.9529	4676	41.02	1267.39	59.07	733.84	51.78	114.36	4527.81	4527.81	2683670	268.367	45432		承德	23.7	22.3	76.2	0.5	45
沧州	华北	116.839	38.3045	170	7.08333	183	29.05		24.27	24	10112.5	105256	10.5256	3623.27	沧州	116.839	38.3045	30	183	51	183	51	42.86	11899.2	1130.8	221725		沧州	116.839	38.3045	2360	36.88	183	62.27	183	52.03	63.69	8169.26	8169.26	6140369	614.037	98608.8		沧州	26.3	27.5	80.5	2.9	45
廊坊	华北	116.684	39.538	196	9.8	1006	35.61		14.81	20	7405	83939	8.3939	2357.17	廊坊	116.684	39.538	43.17	960	79	292	41.7	54.08	7710.8	621.2	78632.9		廊坊	116.684	39.538	2870	44.15	960	82.84	292	45.5	64.5	7054.26	7054.26	4876442	487.644	58865.8		廊坊	26	27	80.5	1.9	45
太原	华北	112.549	37.8706	3710	22.0833	1460	163.63		153.39	168	9130.36	837089	83.7089	5115.74	太原	112.549	37.8706	36.15	1460	277	1103.3	263.8	238	11084	893.2	32245.5		太原	112.549	37.8706	12762	39.88	1500	312	1000	295	320	9218.75	9218.75	22190754	2219.08	71124.2		太原	24	21.5	72.2	1.7	45
大同	华北	113.3	40.0768	1343	23.5614	2080	79.83		79.83	57	14005.3	449804	44.9804	5634.52	大同	113.3	40.0768	28.82	2080	151	96.7	117.3	91.2	12861.8	370.3	24523.2		大同	113.3	40.0768	4615	42.73	2080	160.42	130.2	123.36	108	11422.2	11422.2	7742358	774.236	48263		大同	22.3	17.2	64	2.3	45
阳泉	华北	113.581	37.857	361	12.0333	662	42.03		36.23	30	12076.7	162219	16.2219	3859.6	阳泉	113.581	37.857	33.01	652	67	43.05	53.43	43.05	12411.1	205.4	30656.7		阳泉	113.581	37.857	2215	41.02	651.99	68.1	53.72	57.67	53.72	10735.3	10735.3	3928289	392.829	57684.1		阳泉	23.9	20.5	69.2	1.4	45
长治	华北	113.116	36.1954	391	11.8485	334	53.28		32.11	33	9730.3	196024	19.6024	3679.13	长治	113.116	36.1954	43.87	334	70	334	70.23	45.3	15503.3	398.7	56957.1		长治	113.116	36.1954	2688	45.56	334	73.73	76.2	70.11	59.3	11822.9	11822.9	3460959	346.096	46941		长治	22.9	21.3	76.4	2	45
临汾	华北	111.519	36.088	456	21.7143	1304	18.73		18.73	21	8919.05	79680	7.968	4254.14	临汾	111.519	36.088	25.78	1316	75	37.4	42.9	37.4	11470.6	523.2	69760		临汾	111.519	36.088	2047	37.91	1316	88.32	60	44.03	54	8153.7	8153.7	2430223	243.022	27516.1		临汾	26.8	26.1	74.2	1.9	45
运城	华北	111.008	35.0264	31	2.06667	1237	10.84		10.84	15	7226.67	94481	9.4481	8715.96	运城	111.008	35.0264	10	640	53	44.5	37	30	12333.3	470.8	88830.2		运城	111.008	35.0264	1760	33.85	640	65	56	39	46	8478.26	8478.26	1813167	181.317	27894.9		运城	28.2	24.7	64.7	3.4	45
呼和浩特	华北	111.749	40.8426	1842	25.2329	2054	70.76		65.25	73	8938.36	279801	27.9801	3954.23	呼和浩特	111.749	40.8426	26.05	17224	114	2054	107.65	150	7176.67	743.7	65236.8		呼和浩特	111.749	40.8426	8388	36.47	2053.56	146.86	322.42	124.31	259.07	4798.32	4798.32	19836100	1983.61	135068		呼和浩特	23.1	17.2	61	2.1	45
包头	华北	109.84	40.6574	3692	26.1844	2153	105.92		98.35	141	6975.18	423771	42.3771	4000.86	包头	109.84	40.6574	41.08	27768	248	2591	138.24	180	7680	848.7	34221.8		包头	109.84	40.6574	7870	42.31	2965	197	885	153	186	8225.81	8225.81	29418392	2941.84	149332		包头	23.2	17.6	62	2.2	45
赤峰	华北	118.887	42.2578	817	24.0294	7017	63.55		35.01	34	10297.1	192941	19.2941	3036.05	赤峰	118.887	42.2578	24.27	7078	119	503	72.25	75.9	9519.1	347.6	29210.1		赤峰	118.887	42.2578	4021	38.66	7076.14	129.2	560	83.6	103.9	8046.2	8046.2	7271599	727.16	56281.7		赤 峰	22.8	19.5	70.4	2.2	45
集宁	华北	112.708	37.6978	179	9.42105	114	16.35		16.35	19	8605.26	38077	3.8077	2328.87	乌兰察布	112.708	37.6978	24.63	56039	30	114.2	29.44	35	8411.43	230.2	76733.3		乌兰察布	112.708	37.6978	2339	41.04	420	31.4	60	26.7	60	4450	4450	1543449	154.345	49154.4		集 宁	19.5	16	70.7	2.2	45
通辽	华北	122.243	43.6529	497	19.88	3518	25.51		25.51	25	10204	121411	12.1411	4759.35	通辽	122.243	43.6529	27.55	3212	44	51.7	44.13	35.3	12501.4	329.3	74840.9		通辽	122.243	43.6529	2510	33.03	3212	46.91	75.63	46.91	61.2	7665.03	7665.03	7137491	713.749	152153		通 辽	23.6	22.4	77	4.1	45
海拉尔	华北	119.736	49.2122	288	10.2857	1440	18.07		18.07	28	6453.57	46855	4.6855	2592.97	呼伦贝尔	119.736	49.2122	31.29	1351	26	135	25.53	28	9117.86	324.1	124654		呼伦贝尔	119.736	49.2122	1072	30	1518.9	27.83	265.4	27.07	59.46	4552.64	4552.64	3090090	309.009	111034		海拉尔	20.2	17.3	73.2	4.1	45
乌兰浩特	华北	122.093	46.0727	263	18.7857	781	15.95		15.95	14	11392.9	37181	3.7181	2331.1	巴彦淖尔	122.093	46.0727	24.55	2354	53	668	29.5	32.38	9110.56	217	40943.4		巴彦淖尔	122.093	46.0727	1606	38.24	2354	54.86	698	32.5	42	7738.1	7738.1	2644317	264.432	48201.2		乌兰浩特	22.3	20.2	75.1	2.8	45
东胜	华北	109.963	39.8225	93	10.3333	2200	7.82		7.82	9	8688.89	47275	4.7275	6045.4	鄂尔多斯	109.963	39.8225	14.14	2685	46	625	24.34	99.68	2441.81	594.8	129304		鄂尔多斯	109.963	39.8225	4822	42.67	2884.06	46	195.58	40	112.58	3553.03	3553.03	8802799	880.28	191365		东 胜	21	15.1	60.8	3.4	45
沈阳	东北	123.431	41.8057	3313	20.2012	3495	377.1		360.37	164	21973.8	1996195	199.619	5293.54	沈阳	123.431	41.8057	40.65	3495	505	1506.8	431.86	347	12445.5	2084.1	41269.3		沈阳	123.431	41.8057	19210	42.22	3471	524.59	3133.04	518.28	455	11390.8	11390.8	58204950	5820.49	110953		沈 阳	24.2	24.7	81.9	2.4	45
大连	东北	121.615	38.914	3072	23.4504	2415	223.49		172.33	131	13155	1477897	147.79	6612.81	大连	121.615	38.914	42.77	2568	293	1037.57	277.7	258	10763.6	2152.2	73453.9		大连	121.615	38.914	17698	44.69	2567	301.2	1170	301.2	395.5	7615.68	7615.68	49095246	4909.52	162999		大 连	23.1	24.7	87.5	4.2	45
鞍山	东北	122.994	41.1086	2441	27.7386	622	146.03		120.4	88	13681.8	826001	82.6001	5656.38	鞍山	122.994	41.1086	36.39	624	350	624.29	147.35	143.96	10235.5	1018	29085.7		鞍山	122.994	41.1086	6463	38.7	792	174.81	624.29	151.9	167.18	9086.02	9086.02	12734016	1273.4	72844.9		鞍山	24.9	24.1	76.7	2.8	45
本溪	东北	123.685	41.487	2401	34.7971	1308	93.5		76.88	69	11142	393874	39.3874	4212.56	本溪	123.685	41.487	42.01	1518	96	661.95	85.46	106.5	8024.41	343.3	35760.4		本溪	123.685	41.487	5422	49.74	1518	93.61	1518	88.5	109	8119.27	8119.27	8434548	843.455	90103.1		本 溪	23.9	23	77.7	2.2	45
丹东	东北	124.354	40.0008	1619	32.38	526	95.47		52.37	50	10474	266520	26.652	2791.66	丹东	124.354	40.0008	35.72	835	76	223.21	61.81	53.4	11574.9	326.3	42934.2		丹东	124.354	40.0008	2071	39.08	873.59	78.45	226.11	60.58	53.4	11344.6	11344.6	3383737	338.374	43132.4		丹 东	23.1	25.5	90.4	2.6	45
锦州	东北	121.127	41.0957	959	19.9792	804	90.8		56.95	48	11864.6	362115	36.2115	3988.05	锦州	121.127	41.0957	36.87	729	96	436	92	65.45	14056.5	381.9	39781.2		锦州	121.127	41.0957	3216	41.77	728.8	93.6	436	87.8	77.1	11387.8	11387.8	6323044	632.304	67553.9		锦 州	23.5	24.3	84.1	3.1	45
营口	东北	122.235	40.667	688	16	648	72.35		42.16	43	9804.65	185886	18.5886	2569.26	营口	122.235	40.667	34.1	701	101	183.72	87.32	93.65	9324.08	379.6	37584.2		营口	122.235	40.667	4332	39.38	702	91.5	183.72	91.5	109.55	8352.35	8352.35	8635099	863.51	94372.7		营口	24.8	25.7	82.2	4.2	45
阜新	东北	121.67	42.0216	1142	23.3061	448	78.66		63.55	49	12969.4	170187	17.0187	2163.58	阜新	121.67	42.0216	43.33	468	193	448	78	67	11641.8	142.6	7388.6		阜新	121.67	42.0216	3215	41.75	490	77.46	448	77.46	76.5	10125.5	10125.5	3155772	315.577	40740.7		阜 新	24	23.3	78.2	2	45
朝阳	东北	120.449	41.5737	429	23.8333	497	69.12		22.24	18	12355.6	101740	10.174	1471.93	朝阳	120.449	41.5737	26.21	1141	61	533	50.4	32	15750	212.2	34786.9		朝阳	120.449	41.5737	1409	23.88	1170.5	66.5	570	56.5	43	13139.5	13139.5	2495819	249.582	37531.1		朝 阳	24.1	23.5	78.4	2.7	45
兴城	东北	120.728	40.6148	150	8.33333	2147	53		10.24	18	5688.89	78953	7.8953	1489.68	葫芦岛	120.728	40.6148	43.55	2301	41	575	41	67.18	6103.01	299.5	73048.8		葫芦岛	120.728	40.6148	3105	40.86	2301	82.3	575	43.3	80.8	5358.91	5358.91	3621398	362.14	44002.4		兴 城	23.2	24.9	87.7	2.2	45
长春	东北	125.324	43.8171	4038	35.4211	1116	232.7		167.93	114	14730.7	625815	62.5815	2689.36	长春	125.324	43.8171	41.47	4789	358	302.14	251.67	284.76	8837.97	1508.6	42139.7		长春	125.324	43.8171	12287	37.18	4789	363.81	470.29	308.81	452.03	6831.63	6831.63	35693037	3569.3	98109		长 春	22.6	22.3	81.4	2.7	45
吉林	东北	126.55	43.8379	2460	24.8485	1213	185.14		103.69	99	10473.7	610048	61.0048	3295.06	吉林	126.55	43.8379	40.92	1995	182	1042.75	126.44	165.63	7633.88	629.7	34598.9		吉林	126.55	43.8379	7577	43.8	1995	181.82	498.75	126.11	165.63	7613.96	7613.96	14763494	1476.35	81198.4		吉 林	22.8	22.3	80.5	2.5	45
四平	东北	124.35	43.1664	518	19.1852	407	90		31.72	27	11748.1	123286	12.3286	1369.84	四平	124.35	43.1664	18.86	640	57	550	55	39	14102.6	330.7	58017.5		四平	124.35	43.1664	1827	33.83	1080.96	59.69	87.4	59	54.2	10885.6	10885.6	2686862	268.686	45013.6		四平	23.3	23.3	81.6	2.4	45
通化	东北	125.94	41.7284	589	26.7727	761	87.52		32.46	22	14754.5	107456	10.7456	1227.79	通化	125.94	41.7284	34.16	761	45	761	45.43	46.81	9705.19	233.6	51911.1		通化	125.94	41.7284	1770	35.4	745.4	44.34	64.75	44.34	50.33	8809.85	8809.85	3091746	309.175	69728.1		通 化	22.5	22.4	82.3	1.5	45
白城	东北	122.839	45.6196	518	23.5455	978	21.8		21.8	22	9909.09	74715	7.4715	3427.29	白城	122.839	45.6196	17.39	2525	51	912	25.9	38.11	6796.12	152.2	29843.1		白城	122.839	45.6196	1202	28.62	2525	51.11	49.11	28.26	42.13	6707.81	6707.81	1670875	167.088	32691.7		白城	22.8	21.8	78.7	2.5	45
图们	东北	129.844	42.968	66	6.6	794	9.12		9.12	10	9120	33478	3.3478	3670.83	白山	129.844	42.968	19.92	151	62	132.54	41.6	41.8	9952.15	160.5	25887.1		白山	129.844	42.968	1283	27.3	2736	57.68	383.79	37.75	46.74	8076.59	8076.59	3358339	335.834	58223.6		图们	20.8	20.4	83.2	2.2	45
哈尔滨	东北	126.535	45.8038	3276	21	1637	275.04		244.34	156	15662.8	1157819	115.782	4209.64	哈尔滨	126.535	45.8038	27.49	7086	475	336.01	400.14	336.01	11908.6	1830.5	38536.8		哈尔滨	126.535	45.8038	14099	36.06	7086	473.63	390.54	400.46	390.54	10254	10254	32363205	3236.32	68330.1		哈尔滨	22.6	21.4	78.2	3.4	45
齐齐哈尔	东北	123.918	47.3543	1781	17.4608	4365	190.98		107.01	102	10491.2	352893	35.2893	1847.8	齐齐哈尔	123.918	47.3543	43.68	4365	143	134.79	108.37	134.79	8039.91	422.4	29538.5		齐齐哈尔	123.918	47.3543	5301	37.86	4365	138.38	139.63	108.2	139.63	7749.05	7749.05	6218075	621.808	44934.8		齐齐哈尔	23.7	20.5	70.1	3.5	45
鸡西	东北	130.969	45.2951	683	10.8413	2300	75.63		68.39	63	10855.6	189587	18.9587	2506.77	鸡西	130.969	45.2951	32.11	2300	89	79.23	73.72	79.23	9304.56	204.6	22988.8		鸡西	130.969	45.2951	3179	40.24	2300	85.18	79.23	71.39	79.23	9010.48	9010.48	1893026	189.303	22223.8		鸡 西	21.5	19.6	76.5	1.1	45
鹤岗	东北	130.298	47.3499	276	5.01818	4551	68.3		52.27	55	9503.64	123897	12.3897	1814.01	鹤岗	130.298	47.3499	40.37	4551	68	85	58.81	43	13676.7	112.6	16558.8		鹤岗	130.298	47.3499	2225	33.71	4551	66.75	85	54.9	53.22	10315.7	10315.7	1946697	194.67	29164		鹤 岗	22	19.4	73.5	2.7	45
伊春	东北	128.841	47.7275	586	4.47328	20169	82.13		79.58	131	6074.81	155532	15.5532	1893.73	伊春	128.841	47.7275	22.82	12910	81	159.16	75.47	159.16	4741.77	115.9	14308.6		伊春	128.841	47.7275	4830	29.27	19459	80.98	174.87	75.7	167.37	4522.91	4522.91	1819128	181.913	22463.9		伊 春	20.7	18.9	77.5	2.3	45
佳木斯	东北	130.319	46.7998	1154	24.5532	912	111.41		49.34	47	10497.9	199306	19.9306	1788.94	佳木斯	130.319	46.7998	39.97	1875	83	1073.9	60.6	59.84	10127	241.5	29096.4		佳木斯	130.319	46.7998	4031	41.56	1073.9	79.8	96.98	59.9	96.98	6176.53	6176.53	3640000	364	45614		佳木斯	22.5	20.1	73.9	2	45
牡丹江	东北	129.633	44.5517	594	14.85	1351	142.54		57.17	40	14292.5	249400	24.94	1749.68	牡丹江	129.633	44.5517	45.73	2285	90	86.3	68.84	64.4	10689.4	302.8	33644.4		牡丹江	129.633	44.5517	3026	38.79	2675	88.77	88.58	70.29	78.05	9005.77	9005.77	3369368	336.937	37956.2		牡丹江	21.9	20	76.2	1.9	45
绥化	东北	126.969	46.6538	137	5.95652	2743	22.79		22.79	23	9908.7	126653	12.6653	5557.39	绥化	126.969	46.6538	32.18	2743	89	51.79	30	30	10000	350.8	39415.7		绥化	126.969	46.6538	1113	31.8	2743	86.8	92.77	32.2	35	9200	9200	1124781	112.478	12958.3		绥 化	22.2	20.3	76	3.1	45
黑河	东北	127.528	50.2451	85	9.44444	14432	8.78		8.78	9	9755.56	46842	4.6842	5335.08	黑河	127.528	50.2451	11.05	14444	20	18.5	13.4	18.5	7243.24	120.5	60250		黑河	127.528	50.2451	573	30.16	1444	19.86	27.88	13.66	20	6830	6830	272854	27.2854	13738.9		黑 河	20.9	19.1	77.4	2.7	45
上海	华东	121.474	31.2304	2930	11.72	749	864.46		749.65	250	29986	6095117	609.512	7050.78	上海	121.474	31.2304	37.23	6341	1858	6340.5	1858.08	885.67	20979.4	9154.2	49269.1		上海	121.474	31.2304	38312	43.16	6340.5	2415.15	6340.5	2415.15	998.75	24181.7	24181.7	213391800	21339.2	88355.5		上海	29.6	31.7	76.6	2.8	45
南京	华东	118.797	32.0603	4547	35.2481	947	236.22		209.02	129	16203.1	1485123	148.512	6287.03	南京	118.797	32.0603	44.91	4733	534	2414.44	466.75	577.44	8083.09	2411.1	45151.7		南京	118.797	32.0603	31824	44.63	6588.54	643.08	4226.41	567.11	713.29	7950.62	7950.62	80117800	8011.78	124584		南京	29.5	31.4	76.3	2.7	45
徐州	华东	117.284	34.2058	891	14.371	172	138.26		80.57	62	12995.2	414456	41.4456	2997.66	徐州	117.284	34.2058	36.3	514	192	360.5	131.78	177.4	7428.41	1212.2	63135.4		徐州	117.284	34.2058	10846	39.3	3040	213.19	427.45	162.22	253	6411.86	6411.86	26417600	2641.76	123916		徐州	28.1	29.7	78.3	2.8	45
常州	华东	119.974	31.8112	343	8.79487	187	81.4		53.15	39	13628.2	420608	42.0608	5167.17	常州	119.974	31.8112	38.91	1872	225	384.38	122.39	112.5	10879.1	1303.4	57928.9		常州	119.974	31.8112	7960	42.8	1861.96	231.74	384.38	121.9	185.67	6565.41	6565.41	33496800	3349.68	144545		常州	30	31.6	74.7	3.2	45
南通	华东	120.894	31.9802	378	14	121	153.39		34.33	27	12714.8	344182	34.4182	2243.84	南通	120.894	31.9802	41.77	355	87	141.52	65.27	61.36	10637.2	1472.1	169207		南通	120.894	31.9802	7232	42.05	1706	212.32	387	113.04	171.5	6591.25	6591.25	19087880	1908.79	89901.5		南通	29	32.4	81.1	2.9	45
淮阴	华东	119.035	33.6319	651	27.125	347	113.2		23.97	24	9987.5	142121	14.2121	1255.49	淮安	119.035	33.6319	37.12	3137	95	227	95	95	10000	561.8	59136.8		淮安	119.035	33.6319	5703	40.74	3137	308.89	227	122.21	140	8729.29	8729.29	12909200	1290.92	41792.2		淮阴	27.9	31.2	83.2	2.4	45
杭州	华东	120.155	30.2741	787	11.4058	430	169		109.97	69	15937.7	983815	98.3815	5821.39	杭州	120.155	30.2741	37.31	3327	417	923.97	254.6	344.48	7390.85	2942.7	70568.3		杭州	120.155	30.2741	18606	40.27	3068	450	1022.41	284.16	462.48	6144.27	6144.27	66398609	6639.86	147552		杭州	30.3	30.4	70.6	2.7	45
温州	华东	120.699	27.9938	148	5.48148	187	98.28		40.19	27	14885.2	249782	24.9782	2541.53	温州	120.699	27.9938	24.19	1187	142	397	104.15	153	6807.19	1596.4	112423		温州	120.699	27.9938	7801	38	1187	151	730.03	136.44	204.9	6658.86	6658.86	15782906	1578.29	104523		温州	28.9	32.2	81	2	45
金华	华东	119.647	29.0792	120	10	301	47.9		14.43	12	12025	109122	10.9122	2278.12	金华	119.647	29.0792	35.77	2044	92	379.64	45.41	68.79	6601.25	1063.5	115598		金华	119.647	29.0792	2915	37.8	2049.39	94.57	379.64	47.02	76.68	6131.98	6131.98	5719229	571.923	60476.1		金 华	30.9	28.7	64.4	2.1	45
衢州	华东	118.859	28.9701	31	1.9375	240	29		11.24	16	7025	107604	10.7604	3710.48	衢州	118.859	28.9701	40.14	2354	81	200.1	27.82	44.7	6223.71	329.1	40629.6		衢州	118.859	28.9701	2742	40.9	2354.4	83.61	200.1	29.16	66.6	4378.38	4378.38	4378334	437.833	52366.2		衢 州	30.3	29.8	69.2	2.3	45
丽水	华东	119.923	28.4676	109	15.5714	1502	6.92		6.92	7	9885.71	52694	5.2694	7614.74	丽水	119.923	28.4676	23.62	1502	38	266.13	18.69	26	7188.46	306	80526.3		丽水	119.923	28.4676	1462	44.3	1502	39.61	266.13	15.2	33.33	4560.46	4560.46	2491519	249.152	62901.3		丽 水	30.6	28.9	66	1.5	45
合肥	华东	117.227	31.8206	1654	23.6286	458	99.17		73.33	70	10475.7	388937	38.8937	3921.92	合肥	117.227	31.8206	30.08	596	479	224.74	198.39	224.74	8827.53	853.6	17820.5		合肥	117.227	31.8206	17807	45.3	1126.63	233.82	777.03	205.95	393	5240.46	5240.46	30783146	3078.31	131653		合 肥	29.6	30.7	74.2	3.2	45
芜湖	华东	118.433	31.3529	670	23.1034	203	59.97		42.57	29	14679.3	190420	19.042	3175.25	芜湖	118.433	31.3529	32.79	720	105	230	95.23	117.56	8100.54	400.7	38161.9		芜湖	118.433	31.3529	6195	39.9	1271.7	136.14	721.7	105.63	155	6814.84	6814.84	12690832	1269.08	93219		芜 湖	29.9	30.7	72.9	3.1	45
蚌埠	华东	117.39	32.9163	788	21.8889	445	64.08		44.92	36	12477.8	197765	19.7765	3086.22	蚌埠	117.39	32.9163	27.94	602	92	284.6	76.92	93.47	8229.38	311.3	33837		蚌埠	117.39	32.9163	4620	38.8	789.93	103.57	365.48	81.96	119.05	6884.5	6884.5	5594203	559.42	54013.7		蚌 埠	29	31.5	78.8	3.1	45
黄山	华东	118.338	29.7147	278	23.1667	2354	21.33		10.26	12	8550	69805	6.9805	3272.62	黄山	118.338	29.7147	45.44	2361	43	445.8	24.44	34.2	7146.2	160	37209.3		黄山	118.338	29.7147	2757	45.9	2360.7	50.21	445.8	32.19	59.5	5410.08	5410.08	2157209	215.721	42963.7		黄 山	18.2	19	91	6.5	45
阜阳	华东	115.814	32.8901	483	30.1875	50	17.96		17.96	16	11225	69618	6.9618	3876.28	阜阳	115.814	32.8901	9.48	1844	198	332.67	68.16	60.67	11234.5	324.6	16393.9		阜阳	115.814	32.8901	3245	33.1	1844	217.1	332.67	74.1	97.55	7596.1	7596.1	3479665	347.966	16027.9		阜 阳	28.7	30.5	77.7	2.9	45
六安	华东	116.522	31.7337	330	18.3333	85	14.42		14.42	18	8011.11	39439	3.9439	2735.02	六安	116.522	31.7337	22.39	3583	182	136.12	29.24	44.06	6636.4	312.8	17186.8		六安	116.522	31.7337	2618	37.4	3583	188.79	166.12	37.9	70.2	5398.86	5398.86	3260444	326.044	17270.2		六 安	29.1	30.5	75.9	2	45
宿州	华东	116.964	33.6464	163	9.05556	125	15.19		15.19	18	8438.89	31984	3.1984	2105.6	宿州	116.964	33.6464	30.84	2868	178	164.51	42.02	41.5	10125.3	313	17584.3		宿州	116.964	33.6464	2671	38.1	2868	187.04	164.51	44.07	70	6295.71	6295.71	4149601	414.96	22185.6		宿 州	28.1	30.6	80.7	2.9	45
滁州	华东	118.328	32.2534	298	27.0909	1399	12.53		12.53	11	11390.9	117104	11.7104	9345.89	滁州	118.328	32.2534	27.3333	1404	53	282.6	29.5	42.56	6931.39	328.1	61905.7		滁州	118.328	32.2534	3246	39.1	1404.31	54.13	282.6	35.72	82.9	4308.81	4308.81	2564242	256.424	47371.9		滁 州	28.9	31.7	79.8	2.4	45
巢湖	华东	117.89	31.6245	73	7.3	2063	12.37		12.37	10	12370	84824	8.4824	6857.24	巢湖	117.89	31.6245	24.43	2082	87	145	27	36.3	7438.02	301.9	34701.1		巢湖	117.89	31.6245	1760	37.6068	2031	92.6	48	30.4	46.8	6495.73	6495.73	2352983	235.298	25410.2		巢 湖	30.2	30.7	71.7	2.8	45
亳州	华东	115.779	33.8446	38	4.22222	2226	10.63		10.63	9	11811.1	135172	13.5172	12716.1	亳州	115.779	33.8446	19.31	2226	152	56.52	23.38	32	7306.25	265	17434.2		亳州	115.779	33.8446	1956	39.92	2226	167.03	86.9	33.5	48.98	6839.53	6839.53	2716371	271.637	16262.8		亳 州	28.3	30.1	78.4	3	45
福州	华东	119.296	26.0745	807	16.14	1043	123.59		87.48	50	17496	562730	56.273	4553.2	福州	119.296	26.0745	32.05	1786	186	1043	185.92	170.46	10907	1476.3	79371		福州	119.296	26.0745	10594	42.72	1786	194.76	1043	192.76	248.12	7768.82	7768.82	23015025	2301.5	118171		福 州	29.5	30.5	74.2	2.9	45
厦门	华东	118.089	24.4798	1045	24.3023	555	43.14		38.68	43	8995.35	536485	53.6485	12435.9	厦门	118.089	24.4798	36.67	1569	167	220	114.16	180	6342.22	1006.6	60275.4		厦门	118.089	24.4798	11783	41.78	1569	196.78	281.61	159.69	281.6	5670.81	5670.81	30181565	3018.16	153377		厦门	27.9	30.2	80.5	3.4	45
漳州	华东	117.647	24.513	451	41	265	59.79		18.14	11	16490.9	103128	10.3128	1724.84	漳州	117.647	24.513	43.22	401	54	95.24	36.94	46.77	7898.23	628.5	116389		漳州	117.647	24.513	2460	41.6	400.6	57.45	95.24	39.29	59.28	6627.87	6627.87	5144886	514.489	89554.2		漳 州	29.3	30.5	75	1.6	45
南平	华东	118.178	26.6418	550	26.1905	2653	19.51		19.51	21	9290.48	137335	13.7335	7039.21	南平	118.178	26.6418	35.1	2660	49	370.47	20.79	20.13	10327.9	348	71020.4		南平	118.178	26.6418	1335	47.68	2659.66	49.99	165.81	19.37	28.18	6873.67	6873.67	2413204	241.32	48273.7		南 平	29.7	28.1	67.5	1.3	45
龙岩	华东	117.018	25.0751	422	21.1	2677	13.45		13.45	20	6725	122376	12.2376	9098.59	龙岩	117.018	25.0751	36.1	2678	47	185	28.69	33.3	8615.62	385.6	82042.6		龙岩	117.018	25.0751	1916	42.58	2678	49.78	185	30.55	45	6788.89	6788.89	5686874	568.687	114240		龙 岩	28.3	26.1	68	2	45
宁德	华东	119.548	26.6656	5	0.384615	1492	6.4		6.4	13	4923.08	40414	4.0414	6314.69	宁德	119.548	26.6656	34.42	1537	43	107.5	15.3	17.07	8963.09	343.6	79907		宁德	119.548	26.6656	1065	42.6	1537	43.86	107.5	18.03	25.3	7126.48	7126.48	2146653	214.665	48943.3		宁 德	27.5	27.8	75.9	0.7	45
南昌	华中	115.858	28.6829	1240	19.0769	617	136.8		108.61	65	16709.2	408936	40.8936	2989.3	南昌	115.858	28.6829	47.81	622	215	210	202.3	180	11238.9	1007.7	46869.8		南昌	115.858	28.6829	10582	42.33	820.36	226.36	330	223.74	249.5	8967.54	8967.54	22550663	2255.07	99623		南 昌	30.8	30.5	68.8	1.9	45
景德镇	华中	117.178	29.2688	847	28.2333	408	43.96		28.12	30	9373.33	103090	10.309	2345.09	景德镇	117.178	29.2688	42.29	580	45	160	44.96	72	6244.44	193.1	42911.1		景德镇	117.178	29.2688	4055	51.33	580	48.86	198.5	48.65	78.68	6183.27	6183.27	3520255	352.026	72047.8		景德镇	30.2	29.6	69.1	2.4	45
九江	华中	116.002	29.7051	1083	34.9355	699	71.19		29.12	31	9393.55	132813	13.2813	1865.61	九江	116.002	29.7051	36.04	1572	93	105.64	60.22	80.14	7514.35	428.9	46118.3		九江	116.002	29.7051	5200	52	699	65.4	104.85	62.82	100.23	6267.58	6267.58	6786152	678.615	103764		九 江	31.1	29.8	66.1	2.5	45
吉安	华中	114.965	27.0876	437	33.6154	509	14.86		14.86	13	11430.8	53835	5.3835	3622.81	吉安	114.965	27.0876	24.59	1382	52	210.8	27.9	38.06	7330.53	303.1	58288.5		吉安	114.965	27.0876	2843	56.86	1381.53	57.2	228.7	35.7	50.03	7135.72	7135.72	1736079	173.608	30351		吉安	30.4	29.2	67.4	2.9	45
赣州	华中	114.935	25.8318	582	36.375	479	22.01		22.01	16	13756.3	72921	7.2921	3313.08	赣州	114.935	25.8318	24.65	528	59	50	45.86	50	9172	500.1	84762.7		赣州	114.935	25.8318	3672	38.65	528.28	66.21	112.12	64.6	95	6800	6800	3947742	394.774	59624.6		赣 州	29.9	28.4	67.5	2.3	45
宜春	华中	114.417	27.8157	237	15.8	2532	15.16		15.16	15	10106.7	103407	10.3407	6821.04	宜春	114.417	27.8157	41.37	2532	101	72.59	26.2	32.2	8136.65	372.2	36851.5		宜春	114.417	27.8157	2801	43.09	2532.36	110.68	88	42.49	65	6536.92	6536.92	1887900	188.79	17057.3		宜 春	29.3	28.8	70.8	2.1	45
樟树	华中	115.546	28.0559	21	3	1287	9.38		9.38	7	13400	80154	8.0154	8545.2	抚州	115.546	28.0559	31.93	2153	140	81.3	40.8	42.05	9702.73	262	18714.3		抚州	115.546	28.0559	2731	48.77	2153.3	118.11	85.3	50.69	56.48	8974.86	8974.86	2947773	294.777	24957.9		樟树	30.9	30.1	67.6	1.9	45
济南	华东	117.12	36.6512	2795	26.875	2119	160.67		145.92	104	14030.8	1042431	104.243	6488.03	济南	117.12	36.6512	39.14	3257	353	1195	280	315.3	8880.43	1876.6	53161.5		济南	117.12	36.6512	14494	38.96	3257	355.38	1210	296	371.67	7964.05	7964.05	39085726	3908.57	109983		济 南	28	28.5	75.6	2.8	45
青岛	华东	120.383	36.0671	2066	21.9787	1103	168.31		145.92	94	15523.4	1037005	103.701	6161.28	青岛	120.383	36.0671	38.73	1403	276	1403.15	275.53	250.69	10990.9	2695.8	97673.9		青岛	120.383	36.0671	20992	44.66	3231.2	366.44	1963.2	318.8	469.56	6789.33	6789.33	51501400	5150.14	140545		青 岛	24.3	27.8	91.7	5.2	45
淄博	华东	118.055	36.8135	2137	24.8488	2961	99.81		113.81	86	13233.7	1044552	104.455	10465.4	淄博	118.055	36.8135	38.3	2970	277	578.06	141.09	202.92	6952.99	1431	51660.6		淄博	118.055	36.8135	11040	43.98	2989	282.36	661.62	149.08	250.01	5962.96	5962.96	29565136	2956.51	104707		淄 博	27.5	27.8	75.9	2.8	45
东营	华东	118.675	37.4348	74	2.64286	1998	33.83		28.17	28	10060.7	619292	61.9292	18306	东营	118.675	37.4348	36.04	3294	83	1087	58.22	92.82	6272.36	1166.1	140494		东营	118.675	37.4348	4826	42.71	3294.41	84.19	1099.2	61.48	112.95	5443.12	5443.12	19965867	1996.59	237152		东 营	26.9	28.6	80.9	3.3	45
烟台	华东	121.448	37.4638	1188	30.4615	835	141.72		45.21	39	11592.3	393650	39.365	2777.66	烟台	121.448	37.4638	39.36	2726	180	639.36	126.55	195.22	6482.43	2012.5	111806		烟台	121.448	37.4638	11921	43.19	2722.3	181.56	901.41	139.4	276.45	5042.5	5042.5	26034566	2603.46	143394		烟 台	25.3	26.2	81.4	2.9	45
潍坊	华东	119.162	36.707	653	18.6571	1472	94.61		42.85	35	12242.9	363730	36.373	3844.52	潍坊	119.162	36.707	37.32	1993	154	1687.7	137.86	128	10770.3	1471.2	95532.5		潍坊	119.162	36.707	6841	40.01	2006	184.13	1186.54	123.35	168.21	7333.1	7333.1	12477955	1247.8	67767.1		潍 坊	26.8	28.4	80.8	3.5	45
泰安	华东	117.088	36.2003	540	27	2089	95.25		35.07	20	17535	268479	26.8479	2818.68	泰安	117.088	36.2003	41.1	2087	160	271.22	58.63	97.4	6019.51	855.7	53481.2		泰安	117.088	36.2003	5327	44.02	2087	159.73	405.82	64.5	121.2	5321.78	5321.78	8114067	811.407	50798.6		泰 安	26.5	29.5	85.4	2.1	45
德州	华东	116.357	37.4341	472	17.4815	313	19.55		19.55	27	7240.74	120170	12.017	6146.8	德州	116.357	37.4341	38.67	539	59	539	59.39	46	12910.9	831.8	140983		德州	116.357	37.4341	4652	36.34	539	60.94	539	60.94	107.42	5673.06	5673.06	5428400	542.84	89077.8		德 州	26.8	29.3	83.3	2.3	45
威海	华东	122.12	37.5131	425	28.3333	408	25.66		12.9	15	8600	171260	17.126	6674.2	威海	122.12	37.5131	45.11	769	63	221	46.29	109	4246.79	1169.8	185683		威海	122.12	37.5131	6809	47.95	777	66.2	230	49.77	142	3504.93	3504.93	6851070	685.107	103490		威海	24.3	26.7	88	4.2	45
临沂	华东	118.356	35.1047	341	20.0588	1749	32.47		32.47	17	19100	310758	31.0758	9570.62	临沂	118.356	35.1047	36.11	1761	196	1003.25	137.58	118.89	11572	1211.8	61826.5		临沂	118.356	35.1047	8166	41.88	2656.92	251.44	1277.63	165.67	204.9	8085.41	8085.41	13773950	1377.39	54780.3		临沂	27.2	29.5	81.9	2.7	45
菏泽	华东	115.481	35.2338	443	29.5333	1400	18.93		18.93	15	12620	142991	14.2991	7553.67	菏泽	115.481	35.2338	36.04	1415	146	359.54	65.83	57.46	11456.7	450.8	30876.7		菏泽	115.481	35.2338	3680	40.89	1415	149.82	389.96	69.7	90	7744.44	7744.44	4414056	441.406	29462.4		菏泽	27.8	25.2	67.6	2.2	45
日照	华东	119.527	35.4167	327	25.1538	1915	18.5		18.5	13	14230.8	194873	19.4873	10533.7	日照	119.527	35.4167	41.24	1915	122	362	54.65	65.28	8371.63	426.5	34959		日照	119.527	35.4167	4171	43	2043.09	130.37	403.7	56.03	97.1	5770.34	5770.34	11662700	1166.27	89458.5		日照	25.6	30	91.6	3.3	45
郑州	华中	113.625	34.7466	2863	25.5625	1010	144		115.97	112	10354.5	515897	51.5897	3582.62	郑州	113.625	34.7466	34.9	1010	319	431.43	269.59	320.66	8407.35	1660.6	52056.4		郑州	113.625	34.7466	12677	33.1	1010.3	517.08	439.07	326.01	382.66	8519.57	8519.57	33357336	3335.73	64511		郑州	27.6	29.6	80.3	2.2	45
开封	华中	114.308	34.7973	703	16.3488	359	70.03		50.78	43	11809.3	172779	17.2779	2467.21	开封	114.308	34.7973	28.06	546	85	86	84.23	86	9794.19	408	48000		开封	114.308	34.7973	3679	32.56	546	104.51	121.25	87.29	98.86	8829.66	8829.66	3525997	352.6	33738.4		开封	27.6	30.5	82.8	2.7	45
洛阳	华中	112.454	34.6197	877	19.9318	544	106.92		75.98	44	17268.2	447687	44.7687	4187.12	洛阳	112.454	34.6197	38	544	161	144.92	151.18	144.92	10432	1112.4	69093.2		洛阳	112.454	34.6197	7148	37.23	593.5	215	331.42	203	191.85	10581.2	10581.2	12236651	1223.67	56914.7		洛阳	27.5	29.2	79.7	1.7	45
安阳	华中	114.392	36.0976	542	18.0667	247	65.53		42.03	30	14010	2224888	222.489	33952.2	安阳	114.392	36.0976	34.49	544	106	203	69	73	9452.05	557.5	52594.3		安阳	114.392	36.0976	3095	28.14	543.6	112.82	153	71.15	79	9006.33	9006.33	4538105	453.81	40224.3		安阳	27.4	28.8	79.1	1.2	45
新乡	华中	113.927	35.3031	1064	26.6	187	79.81		47.38	40	11845	188540	18.854	2362.36	新乡	113.927	35.3031	40.9	346	100	99	72.12	90.92	7932.25	544.2	54420		新乡	113.927	35.3031	4492	40.84	346	113	140	75.9	110.1	6893.73	6893.73	5685015	568.501	50309.9		新乡	27.6	29.9	81.1	1.5	45
许昌	华中	113.852	34.0358	595	33.0556	88	38.25		20.88	18	11600	108509	10.8509	2836.84	许昌	113.852	34.0358	42.68	97	48	97	40.45	63	6420.63	605.5	126146		许昌	113.852	34.0358	3289	35.75	97	41.85	97	41.85	84	4982.14	4982.14	2976705	297.671	71128		许昌	28	30.1	79.8	2.7	45
三门峡	华中	111.2	34.7728	298	24.8333	185	36.22		12.05	12	10041.7	52899	5.2899	1460.49	三门峡	111.2	34.7728	25.21	185	29	30	25.95	28	9267.86	335.2	115586		三门峡	111.2	34.7728	1304	43.47	185	32	30	29	30	9666.67	9666.67	1547888	154.789	48371.5		三门峡	27.2	25.4	70.6	2.4	45
驻马店	华中	114.022	33.0115	166	13.8333	198	12.32		12.32	12	10266.7	61894	6.1894	5023.86	驻马店	114.022	33.0115	26.89	770	65	49.7	31.06	48.2	6443.98	500.4	76984.6		驻马店	114.022	33.0115	2795	40.51	1365.1	82.27	185	42.96	69	6226.09	6226.09	2656403	265.64	32288.8		驻马店	28.2	30.3	79.4	2.3	45
南阳	华中	112.528	32.9907	515	25.75	174	24.33		24.33	20	12165	121215	12.1215	4982.12	南阳	112.528	32.9907	31.28	1988	170	215.48	92.01	81.26	11322.9	1053.4	61964.7		南阳	112.528	32.9907	3753	25.19	2142.75	211.07	640.77	121.17	148.99	8132.76	8132.76	5943473	594.347	28158.8		南阳	27.7	30.9	83.4	1.8	45
信阳	华中	114.091	32.147	143	7.94444	222	19.25		19.25	18	10694.4	55101	5.5101	2862.39	信阳	114.091	32.147	28.59	3672	142	182.3	44.8	52	8615.38	508.6	35816.9		信阳	114.091	32.147	3563	42.42	3604	153.1	259.51	47.1	84	5607.14	5607.14	4086167	408.617	26689.5		信 阳	28.4	29.6	76.7	3.5	45
武汉	华中	114.305	30.5931	4455	23.5714	1627	374.47		328.42	189	17376.7	1534921	153.492	4098.92	武汉	114.305	30.5931	37.64	8494	828	2718	451.61	222.3	20315.3	2238	27029		武汉	114.305	30.5931	20758	38.87	8494.41	821.71	888.42	495.75	543.28	9125.13	9125.13	72667200	7266.72	88434.1		武 汉	30	31.7	74.9	2.4	45
黄石	华中	115.039	30.2	557	18.5667	179	54.39		45.76	30	15253.3	200472	20.0472	3685.82	黄石	115.039	30.2	39.1	237	68	237	67.8	62	10935.5	343.2	50470.6		黄石	115.039	30.2	2802	31.84	237	71.9	237	71.9	87.61	8206.83	8206.83	5609400	560.94	78016.7		黄 石	30.7	31.3	71.1	1.7	45
宜昌	华中	111.286	30.692	744	25.6552	330	37.16		37.16	29	12813.8	192227	19.2227	5172.95	宜昌	111.286	30.692	40.13	4232	124	541	69.02	72.54	9514.75	608.1	49040.3		宜昌	111.286	30.692	6295	41.14	4232	142.34	541	75.12	152.6	4922.67	4922.67	12486218	1248.62	87721.1		宜 昌	28.7	30	76.4	1	45
荆门	华中	112.199	31.0354	640	24.6154	4412	21.05		21.05	26	8096.15	240406	24.0406	11420.7	荆门	112.199	31.0354	44.75	2391	58	194	30.44	44.6	6825.11	310.3	53500		荆门	112.199	31.0354	2144	39.7	2391	70.77	194	41.21	54.05	7624.42	7624.42	4276900	427.69	60433.8		荆 门	28.9	31.2	78.5	3.1	45
长沙	华中	112.939	28.2282	2454	24.297	367	142.94		111.32	101	11021.8	582404	58.2404	4074.46	长沙	112.939	28.2282	36.41	556	219	556.33	218.75	181.23	12070.3	1519.5	69383.6		长沙	112.939	28.2282	11206	34.37	1007.66	316.53	1007.66	316.53	287.51	11009.4	11009.4	45049425	4504.94	142323		长 沙	29.8	29.6	70.7	2.9	45
株洲	华中	113.134	27.828	1364	27.28	427	69.45		41.49	50	8298	293969	29.3969	4232.81	株洲	113.134	27.828	36.11	537	79	470.33	60.44	89.58	6747.04	524.1	66341.8		株洲	113.134	27.828	5500	41.35	873	120.54	837	105.4	132.63	7946.92	7946.92	9569404	956.94	79387.8		株 洲	30.1	28.5	66.9	2.5	45
衡阳	华中	112.572	26.8934	788	17.1304	559	100.07		48.71	46	10589.1	213751	21.3751	2136.01	衡阳	112.572	26.8934	34.51	509	95	120	90.44	93	9724.73	590.9	62200		衡阳	112.572	26.8934	5163	32.47	578	116.98	123.68	102	114.3	8923.88	8923.88	6360218	636.022	54370.1		衡 阳	30	28.7	67.8	2.4	45
邵阳	华中	111.468	27.2389	329	18.2778	411	68.73		24.72	18	13733.3	112359	11.2359	1634.79	邵阳	111.468	27.2389	20.07	436	66	60	58.85	45	13077.8	360.1	54560.6		邵阳	111.468	27.2389	2017	36.02	436	76.2	67	67.11	56	11983.9	11983.9	2342414	234.241	30740.3		邵 阳	28.6	27.6	70.7	1.9	45
岳阳	华中	113.129	29.3568	423	9.83721	824	71.18		30.28	43	7041.86	249938	24.9938	3511.35	岳阳	113.129	29.3568	39.87	1247	85	131.3	60.5	78.59	7698.18	634.9	74694.1		岳阳	113.129	29.3568	3709	42.15	1254	93.5	155	63.9	88	7261.36	7261.36	10310437	1031.04	110272		岳 阳	30.3	29.5	68.5	3.6	45
常德	华中	111.698	29.0317	355	15.4348	2595	85.19		30.13	23	13100	307104	30.7104	3604.93	常德	111.698	29.0317	38.59	2748	139	336.54	55.49	71.83	7725.18	634.2	45625.9		常德	111.698	29.0317	3734	43.42	2510	148	339.16	65.35	85.92	7605.91	7605.91	10685731	1068.57	72200.9		常 德	30.1	31.1	73.1	1.9	45
郴州	华中	113.015	25.7705	528	26.4	277	17.88		17.88	20	8940	100448	10.0448	5617.9	郴州	113.015	25.7705	37.19	2246	68	59.6	32.85	40.7	8071.25	477.7	70250		郴州	113.015	25.7705	2770	38.47	2246	76.8	580	53.56	73.05	7331.96	7331.96	4892407	489.241	63703.2		郴 州	29.6	27.8	67.2	2.2	45
广州	华南	113.264	23.1291	3508	19.2747	1444	84.55		291.43	182	16012.6	3181136	318.114	37624.3	广州	113.264	23.1291	36.38	3848	637	3848.43	636.76	843.7	7547.23	5154.2	80913.7		广州	113.264	23.1291	41983	41	3843.43	684.94	1395.52	539.29	1023.63	5268.41	5268.41	141465480	14146.5	206537		广 州	29.3	31.3	77	1.5	45
深圳	华南	114.058	22.5431	2568	37.2174	328	21.9		35.07	69	5082.61	1354952	135.495	61870	深圳	114.058	22.5431	38.77	1953	862	1952.84	861.55	764	11276.8	4950.9	57435		深圳	114.058	22.5431	39267	45.08	1996.78	1062.89	1996.78	1062.89	871.19	12200.4	12200.4	145002302	14500.2	136423		深 圳	29.1	31.3	77.9	2.7	45
汕头	华南	116.682	23.3541	827	26.6774	246	97.51		57.86	31	18664.5	372408	37.2408	3819.18	汕头	116.682	23.3541	34.83	1956	494	168.48	223	168.48	13236	651.4	13186.2		汕头	116.682	23.3541	10344	41.88	1956	540	607.88	236.12	247.39	9544.44	9544.44	15525794	1552.58	28751.5		汕 头	28.4	31.7	82.1	2.5	45
佛山	华南	113.121	23.0215	578	25.1304	77	93.33		30.32	23	13182.6	450041	45.0041	4822.04	佛山	113.121	23.0215	34.6	3869	361	530.41	122.13	142.91	8545.94	2383.2	66016.6		佛山	113.121	23.0215	6091	38.8	3845.9	381.73	734.72	134.74	157.28	8566.89	8566.89	70101725	7010.17	183642		佛 山	28.2	30.4	79.7	1.4	45
湛江	华南	110.359	21.2707	844	23.4444	1460	63.38		40.1	36	11138.9	400654	40.0654	6321.46	湛江	110.359	21.2707	43.99	1460	148	73.35	147.38	73.35	20092.7	658.1	44466.2		湛江	110.359	21.2707	4399	40.73	1460	165.22	110	86.03	107.92	7971.65	7971.65	10144746	1014.47	61401.4		湛 江	29.1	32.9	81.9	2.3	45
惠州	华南	114.416	23.1123	383	27.3571	419	84.18		16.1	14	11500	149669	14.9669	1777.96	惠州	114.416	23.1123	32.43	4060	171	1839	112.37	110.15	10201.5	803.4	46982.5		惠州	114.416	23.1123	8531	36	2716	138.84	981.19	96.54	237	4073.42	4073.42	17908026	1790.8	128983		惠 州	28.4	32	82.9	2.4	45
梅州	华南	116.122	24.2886	224	18.6667	299	80		13.22	12	11016.7	71897	7.1897	898.712	梅州	116.122	24.2886	28.29	322	31	32.89	31.08	32.89	9449.68	314.5	101452		梅州	116.122	24.2886	2144	42.88	3053	95.65	168	40.32	50	8064	8064	3295820	329.582	34457.1		梅 州	28.9	29.5	74.2	1.1	45
汕尾	华南	115.375	22.7862	3	0.428571	401	46.38		10.78	7	15400	58550	5.855	1262.4	汕尾	115.375	22.7862	31.38	415	48	94.21	23	13.2	17424.2	211	43958.3		汕尾	115.375	22.7862	658	41.13	392	51.99	282.66	21.78	15.67	13899.2	13899.2	1974687	197.469	37982.1		汕 尾	28.6	32.3	82.7	2.9	45
阳江	华南	111.982	21.858	210	26.25	2488	41.51		21.52	8	26900	97921	9.7921	2358.97	阳江	111.982	21.858	24.89	7813	265	160	39.6	38.1	10393.7	295.3	11143.4		阳江	111.982	21.858	1780	36.33	439	68.62	357	38.01	46.47	8179.47	8179.47	3710206	371.021	54068.9		阳江	28	32	84.8	1.9	45
南宁	华南	108.367	22.817	2017	28.8143	1834	85.17		72.19	70	10312.9	381114	38.1114	4474.74	南宁	108.367	22.817	32.29	6569	260	793.47	159.51	179.06	8908.19	723.4	27823.1		南宁	108.367	22.817	11914	42.1	6569	279.63	841.08	198.53	283.02	7014.7	7014.7	20173877	2017.39	72144.9		南宁	28	31.3	83	1.1	45
柳州	华南	109.428	24.326	1923	30.0469	651	70.45		60.93	64	9520.31	395830	39.583	5618.59	柳州	109.428	24.326	32.17	658	102	437.11	95.04	112.5	8448	512	50196.1		柳州	109.428	24.326	7381	41.47	1016	115.72	464.39	109.77	177.54	6182.83	6182.83	14880738	1488.07	128593		柳州	28	30.4	80.6	1.7	45
桂林	华南	110.18	25.2345	1016	28.2222	565	42.01		36.41	36	10113.9	187031	18.7031	4452.06	桂林	110.18	25.2345	40.29	565	76	565	75.69	58.88	12855	531.8	69973.7		桂林	110.18	25.2345	2822	42.12	565	76.72	565	75.8	67.13	11291.5	11291.5	4795511	479.551	62506.7		桂林	27.6	29.5	80.1	1.4	45
梧州	华南	111.279	23.477	337	25.9231	307	25.74		21.25	13	16346.2	107403	10.7403	4172.61	梧州	111.279	23.477	35.9	1097	39	307	36.15	36.1	10013.9	228.4	58564.1		梧州	111.279	23.477	1462	37.49	1097.2	38.09	307	38.09	37.5	10157.3	10157.3	3784612	378.461	99359.7		梧州	27.8	30.5	81.8	0.6	45
北海	华南	109.12	21.4813	264	20.3077	275	26.59		11.29	13	8684.62	74980	7.498	2819.86	北海	109.12	21.4813	48.07	957	58	957	56.7	40.75	13914.1	181.6	31310.3		北海	109.12	21.4813	2774	39.07	957	63.56	957	35.19	71.42	4927.19	4927.19	5671275	567.128	89227.1		北海	28.8	33	83.5	2.8	45
玉林	华南	110.165	22.6364	47	4.27273	2697	14.45		14.45	11	13136.4	155279	15.5279	10746	玉林	110.165	22.6364	22.92	1251	94	219.04	42.22	50.5	8360.4	356.3	37904.3		玉林	110.165	22.6364	2431	36.28	1251.3	106.37	302.04	52.75	66.56	7925.18	7925.18	3509752	350.975	32995.7		玉林	27.5	31.3	85.4	1.2	45
百色	华南	106.618	23.9023	37	2.84615	3713	9.04		9.04	13	6953.85	48829	4.8829	5401.44	百色	106.618	23.9023	38.12	3702	34	362	16.23	31.14	5211.95	239.4	70411.8		百色	106.618	23.9023	1387	37.49	3702	35.34	362.6	19.7	37.39	5268.79	5268.79	1730793	173.079	48975.5		百色	27.3	30.4	84	1.2	45
河池	华南	108.085	24.6929	105	9.54545	2340	8.04		8.04	11	7309.09	46455	4.6455	5777.99	河池	108.085	24.6929	29.63	2340	33	80	19.96	16.92	11796.7	207	62727.3		河池	108.085	24.6929	607	28.9	2340	34.24	80	20.57	21	9795.24	9795.24	915438	91.5438	26735.9		河池	27.8	29.5	79.1	1.5	45
钦州	华南	108.654	21.9799	107	15.2857	4657	11.46		11.46	7	16371.4	113097	11.3097	9868.85	钦州	108.654	21.9799	18.06	4767	128	229.98	24.69	84.66	2916.37	205.5	16054.7		钦州	108.654	21.9799	3028	34.8	4767.2	142.4	354.38	23.33	87.57	2664.15	2664.15	4765893	476.589	33468.3		钦州	27.9	32.6	86.9	2.7	45
海口	华南	110.198	20.044	460	18.4	218	28.02		28.02	25	11208	222528	22.2528	7941.76	海口	110.198	20.044	35.24	2304	134	209.36	80.9	91.42	8849.27	311.8	23268.7		海口	110.198	20.044	5253	42.36	2510	214.13	562.4	97.3	123.6	7872.17	7872.17	9046355	904.635	42247		海口	28.7	32.5	82.7	2.2	45
三亚	华南	109.512	18.2528	152	9.5	1887	10.28		10.28	16	6425	58232	5.8232	5664.59	三亚	109.512	18.2528	50.9	1919	54	60	25.7	20	12850	74.2	13740.7		三亚	109.512	18.2528	1636	34.81	1919.58	57.69	188	19.1	62.4	3060.9	3060.9	3734888	373.489	64740.6		三亚	28.6	32.6	83.5	2	45
成都	西南	104.067	30.5728	1699	19.5287	1382	250.99		171.33	87	19693.1	1185642	118.564	4723.86	成都	104.067	30.5728	35.6	2131	503	779.01	386.28	408.66	9452.36	2370.8	47133.2		成都	104.067	30.5728	21246	40.16	2130	564.94	779.77	451.85	528.9	8543.2	8543.2	64815506	6481.55	114730		成都	25.1	27.7	87.1	1.5	45
重庆	西南	106.552	29.563	1418	16.2989	1534	368.61		226.68	87	26055.2	1063660	106.366	2885.6	重庆	106.552	29.563	22.31	26041	1540	5577.55	765.48	667.45	11468.7	3070.5	19938.3		重庆	106.552	29.563	46452	41.66	29591.7	1793.16	6133.93	885.05	1114.92	7938.24	7938.24	96228100	9622.81	53664		重庆	28.7	28.9	73.6	1.6	45
攀枝花	西南	101.719	26.5823	1177	28.0238	2586	44.81		41.55	42	9892.86	254181	25.4181	5672.42	攀枝花	101.719	26.5823	41.6	2018	69	329	56.88	54	10533.3	248	35942		攀枝花	101.719	26.5823	3014	43.68	2017.05	68.71	326.66	56.55	69.38	8150.76	8150.76	5889422	588.942	85714.2		攀枝花	24.6	23.4	75.8	0.8	45
泸州	西南	105.442	28.8718	380	25.3333	215	56.67		26.29	15	17526.7	103457	10.3457	1825.6	泸州	105.442	28.8718	31.37	2132	144	410.38	61.07	47.95	12736.2	284	19722.2		泸州	105.442	28.8718	4358	39.98	2132	149.52	411.38	94.78	109.37	8666	8666	5875464	587.546	39295.5		泸州	27.3	28.9	79.8	1.9	45
绵阳	西南	104.679	31.4675	539	21.56	1570	65.95		26.29	25	10516	73289	7.3289	1111.28	绵阳	104.679	31.4675	33.62	1570	119	362.1	73	80.48	9070.58	482.5	40546.2		绵阳	104.679	31.4675	4190	38.09	1570	125.44	465	82.85	110	7531.82	7531.82	6995952	699.595	55771.3		绵阳	25.5	27.6	84.7	1.2	45
广元	西南	105.843	32.4354	125	4.46429	4962	35.52		18.22	28	6507.14	82620	8.262	2326.01	广元	105.843	32.4354	21.79	4535	92	216.7	29.54	31.82	9283.47	145.2	15782.6		广元	105.843	32.4354	1859	37.18	4535	93.48	216.7	35.29	50.43	6997.82	6997.82	2478856	247.886	26517.5		广元	25.7	25.8	78.3	0.8	45
遂宁	西南	105.593	30.5328	50	6.25	1849	30.96		14.61	8	18262.5	118902	11.8902	3840.5	遂宁	105.593	30.5328	21.31	1875	150	373.98	42.49	43.54	9758.84	206.6	13773.3		遂宁	105.593	30.5328	2471	32.51	1876	152.75	298.62	63.67	75.9	8388.67	8388.67	2999645	299.964	19637.6		遂宁	27.2	29.9	83.1	1	45
内江	西南	105.058	29.5802	256	16	1566	94.05		25.6	16	16000	128070	12.807	1361.72	内江	105.058	29.5802	16.22	1569	141	204.09	49.21	32.92	14948.4	254.8	18070.9		内江	105.058	29.5802	2509	43.26	1569	142.77	240	60.2	58.01	10377.5	10377.5	3907583	390.758	27369.8		内江	27	28.8	80.9	1.9	45
乐山	西南	103.766	29.5521	242	12.1	2514	89.79		34.11	20	17055	198248	19.8248	2207.91	乐山	103.766	29.5521	23.61	2514	115	92.83	48.54	48.24	10062.2	306.7	26669.6		乐山	103.766	29.5521	2389	35.13	2514	116.12	166.73	48.82	68.01	7178.36	7178.36	5559975	555.997	47881.3		乐山	25.9	27.5	82.5	1.3	45
宜宾	西南	104.643	28.7518	372	28.6154	1123	24.1		24.1	13	18538.5	113217	11.3217	4697.8	宜宾	104.643	28.7518	30.27	1123	79	52.71	35.85	45.2	7931.42	370	46835.4		宜宾	104.643	28.7518	3010	32.02	2561.42	120.27	103.75	57.2	93.52	6116.34	6116.34	5579072	557.907	46387.9		宜宾	26.8	29.1	82.8	0.7	45
南充	西南	106.111	30.8378	91	8.27273	110	18.03		18.03	11	16390.9	85736	8.5736	4755.19	南充	106.111	30.8378	34.78	2527	191	420	69	61.23	11269	335.3	17555		南充	106.111	30.8378	4469	41	2527	196.65	420	93	109	8532.11	8532.11	4764981	476.498	24230.8		南充	27.1	28.5	79.6	1.1	45
达县	西南	107.512	31.1961	74	7.4	266	18.81		18.81	10	18810	67958	6.7958	3612.87	达州	107.512	31.1961	17.7	451	41	89	30.52	20.01	15252.4	342.6	83561		达州	107.512	31.1961	1579	42.68	3462	182.81	159	59.49	68	8748.53	8748.53	1834866	183.487	10037		达县	27.9	28.7	76.5	1.2	45
雅安	西南	107.468	31.2096	206	29.4286	1061	9.85		9.85	7	14071.4	53283	5.3283	5409.44	雅安	107.468	31.2096	25.14	1070	35	28.5	21.12	20.13	10491.8	126.5	36142.9		雅安	107.468	31.2096	1213	41.83	1684.27	62.7	196.89	24.66	29.2	8445.21	8445.21	1698163	169.816	27083.9		雅安	25.2	25.6	80	1.6	45
峨眉山	西南	103.485	29.6012	82	11.7143	1171	10		9.46	7	13514.3	68709	6.8709	6870.9	眉山	103.485	29.6012	25.16	1331	84	56	30.37	39.4	7708.12	245.1	29178.6		眉山	103.485	29.6012	1717	38.16	1331	87.2	56.5	30.67	45.2	6785.4	6785.4	2938832	293.883	33702.2		峨眉山	12.1	12.1	85.8	3.1	45
贵阳	西南	106.63	26.6477	3403	40.0353	2436	101.86		101.86	85	11983.5	514883	51.4883	5054.81	贵阳	106.63	26.6477	40.98	2408	206	414.77	178.88	132	13551.5	525.6	25514.6		贵阳	106.63	26.6477	13007	36	2407.87	236.84	414.77	195.46	299	6537.12	6537.12	15913553	1591.36	67191.2		贵 阳	23.9	22	74.3	2.4	45
遵义	西南	106.927	27.7257	237	19.75	311	26.19		26.19	12	21825	151806	15.1806	5796.33	遵义	106.927	27.7257	45.14	1316	82	220	70	50.18	13949.8	407.6	49707.3		遵义	106.927	27.7257	2682	31.19	1316	92	220	75.89	63.25	11998.4	11998.4	4434100	443.41	48196.7		遵 义	25.9	23.4	70.2	1.2	45
安顺	西南	105.948	26.2531	101	10.1	1710	17.41		17.41	10	17410	75867	7.5867	4357.67	安顺	105.948	26.2531	15.63	1710	88	109.48	40.32	29.1	13855.7	106	12045.5		安顺	105.948	26.2531	938	22.88	1704	86.89	109.48	46.65	40.8	11433.8	11433.8	1671381	167.138	19235.6		安 顺	22	20.6	78	2.8	45
昆明	西南	102.833	24.8801	359	3.73958	2081	139.66		112.89	96	11759.4	819435	81.9435	5867.36	昆明	102.833	24.8801	26.08	4061	306	472.57	217.09	253.3	8570.47	1061.6	34692.8		昆明	102.833	24.8801	15600	39.29	3842.3	309.45	1749	229.56	407.37	5635.17	5635.17	26878600	2687.86	86859.3		昆 明	19.4	19.3	85.8	1.7	45
大理	西南	100.268	25.6065	78	9.75	1468	13.66		13.66	8	17075	109857	10.9857	8042.24	丽江	100.268	25.6065	18.85	1255	15	22	10.5	18.4	5706.52	60.3	40200		丽江	100.268	25.6065	941	40.91	1255	18.48	26	12.98	23.2	5594.83	5594.83	831077	83.1077	44971.7		大 理	19.5	19.2	84.8	1.5	45
昭通	西南	103.717	27.3383	13	3.25	2167	8.9		8.9	4	22250	91161	9.1161	10242.8	昭通	103.717	27.3383	9.7	2240	80	90	23.51	22.5	10448.9	167.2	20900		昭通	103.717	27.3383	1152	31.14	2240	85.8	61	24.73	37.1	6665.77	6665.77	1876332	187.633	21868.7		昭 通	19.8	17.5	75.9	1.3	45
玉溪	西南	102.527	24.3473	44	7.33333	1004	6.54		6.54	6	10900	290937	29.0937	44485.8	玉溪	102.527	24.3473	38.16	1004	41	46.7	13.7	22.3	6143.5	368.2	89804.9		玉溪	102.527	24.3473	1080	30	1004	49.53	88.12	23.9	36.43	6560.53	6560.53	5835964	583.596	117827		玉 溪	20.3	20.1	84.5	1.3	45
保山	西南	99.1618	25.112	42	10.5	5011	6.44		6.44	4	16100	63383	6.3383	9842.08	保山	99.1618	25.112	10	5011	88	33	15	18.6	8064.52	117.4	13340.9		保山	99.1618	25.112	712	26.37	5011	94.3	60	26.1	26.5	9849.06	9849.06	1680006	168.001	17815.5		保山	20.7	20.3	83.3	1.5	45
西安	西北	108.94	34.3416	3542	25.6667	1066	226.98		195.9	138	14195.7	197252	19.7252	869.028	西安	108.94	34.3416	30.43	3582	641	313.8	331.25	267.91	12364.2	1270.1	19814.4		西安	108.94	34.3416	17893	42.2	3582	659.17	430	390.92	424	9219.81	9219.81	40972200	4097.22	62157.3		西 安	27.1	25.2	70.4	1.7	45
铜川	西北	108.945	34.8968	330	18.3333	781	33.93		28.07	18	15594.4	230250	23.025	6786.03	铜川	108.945	34.8968	24.17	2406	76	55	39.2	36.54	10728	69.5	9144.74		铜川	108.945	34.8968	1943	44.16	2406	75.98	55	39.36	44.12	8921.12	8921.12	2961350	296.135	38975.4		铜 川	23.6	21	72.2	1.9	45
宝鸡	西北	107.238	34.3632	570	21.1111	555	62		33.78	27	12511.1	197252	19.7252	3181.48	宝鸡	107.238	34.3632	41.59	3574	138	63.62	63.8	63.5	10047.2	415.8	30130.4		宝鸡	107.238	34.3632	4520	46.12	3574	147.56	156.3	77.52	86.34	8978.46	8978.46	8738872	873.887	59222.5		宝 鸡	25.8	23	69.4	1.4	45
延安	西北	109.49	36.5854	52	5.77778	3556	11.33		11.33	9	12588.9	43755	4.3755	3861.87	延安	109.49	36.5854	20.5	3541	42	43.25	24.46	24.16	10124.2	370.6	88238.1		延安	109.49	36.5854	1431	39.75	3556	46.92	43.34	28.64	36	7955.56	7955.56	2165740	216.574	46158.1		延 安	23.4	20.3	70.6	1.4	45
汉中	西北	107.023	33.0675	93	5.8125	556	16.99		16.99	16	10618.7	82827	8.2827	4875.04	汉中	107.023	33.0675	18.45	556	82	38	53	28	18928.6	216.6	26414.6		汉中	107.023	33.0675	1299	38.21	556	56.82	86	38.04	34.1	11155.4	11155.4	1771420	177.142	31176		汉 中	25.4	26.8	82.8	0.6	45
榆林	西北	109.735	38.2854	23	1.64286	7053	7.71		7.71	14	5507.14	30627	3.0627	3972.37	榆林	109.735	38.2854	18.92	7053	60	119	24	36	6666.67	320	53333.3		榆林	109.735	38.2854	2026	28.94	7053	60	119	26	52	5000	5000	4612640	461.264	76877.3		榆 林	23.5	18.1	62.6	2.6	45
安康	西北	109.029	32.6847	51	2.21739	3652	14.22		14.22	23	6182.61	81817	8.1817	5753.66	安康	109.029	32.6847	33.21	140	60	27.2	25	27.2	9191.18	137	22833.3		安康	109.029	32.6847	1581	40.54	3640	102.45	160	30.55	39	7833.33	7833.33	1874680	187.468	18298.5		安 康	27.4	27.6	75.8	1.1	45
兰州	西北	103.834	36.0611	2062	12.6503	1632	127.1		119.46	163	7328.83	641477	64.1477	5047.03	兰州	103.834	36.0611	34.97	1647	221	185.91	183.63	175.81	10444.8	567	25656.1		兰州	103.834	36.0611	7022	33.92	1631.6	205.42	220.3	185.77	207	8974.4	8974.4	14927952	1492.8	72670.4		兰 州	23.5	14.4	49.8	1.4	45
天水	西北	105.725	34.5809	163	6.79167	5862	34.36		24.5	24	10208.3	143499	14.3499	4176.34	天水	105.725	34.5809	32.55	412	124	58.61	63.34	46.12	13733.7	146.2	11790.3		天水	105.725	34.5809	1589	34.54	5861	124	60	63.6	45.8	13886.5	13886.5	2672215	267.221	21550.1		天 水	22.7	19.7	71.5	1	45
平凉	西北	106.665	35.5431	205	25.625	1936	9.83		9.83	8	12287.5	32215	3.2215	3277.21	平凉	106.665	35.5431	23.46	1936	49	255	23.75	36	6597.22	110.2	22489.8		平凉	106.665	35.5431	38	30	1936	54.66	255	28.4	36	7888.89	7888.89	993328	99.3328	18172.9		平 凉	21.4	18	70.7	1.8	45
武威	西北	102.638	37.9283	78	7.8	5081	13.31		13.31	10	13310	74258	7.4258	5579.11	武威	102.638	37.9283	21.39	5081	195	24.64	22.5	24.64	9131.49	141.8	7271.79		武威	102.638	37.9283	662	21.35	5081	102.7	31	31.4	31	10129	10129	2372943	237.294	23105.6		武 威	21.8	14.3	54.8	1.2	45
张掖	西北	100.45	38.9259	3	0.1875	4240	8.38		8.38	16	5237.5	66013	6.6013	7877.45	张掖	100.45	38.9259	18.31	4200	51	26.91	14.96	26.91	5559.27	110.8	21725.5		张掖	100.45	38.9259	1246	19.78	4240	51.88	200	18.54	63.1	2938.19	2938.19	1405361	140.536	27088.7		张 掖	21.1	13.8	55.2	1.6	45
酒泉	西北	98.4944	39.7328	217	27.125	3386	7.1		7.1	8	8875	47220	4.722	6650.7	酒泉	98.4944	39.7328	28.15	3349	44	66.6	21.3	29	7344.83	146	33181.8		酒泉	98.4944	39.7328	1749	36.44	3386	46.85	232	23.63	48	4922.92	4922.92	2030774	203.077	43346.3		酒 泉	21.7	13.2	50.9	1.8	45
西宁	西北	101.778	36.6171	471	9.05769	350	63.37		55.18	52	10611.5	162693	16.2693	2567.35	西宁	101.778	36.6171	30.13	380	107	380	83.66	64.92	12886.6	320	29906.5		西宁	101.778	36.6171	3277	38.55	510	131.56	380	116.65	85	13723.5	13723.5	6880685	688.068	52300.7		西 宁	18.1	11.8	56.9	1.5	45
银川	西北	106.231	38.4872	172	4.64865	1277	39.47		35.59	37	9618.92	188544	18.8544	4776.89	银川	106.231	38.4872	24.15	2311	86	1773.5	86.08	107	8044.86	360	41860.5		银川	106.231	38.4872	6102	40.95	2310.6	103.37	1773.5	103.37	148.61	6955.79	6955.79	7939008	793.901	76801.9		银 川	23.5	18.7	64.7	1.9	45
石嘴山	西北	106.383	38.9832	717	17.0714	529	31.18		25.79	42	6140.48	91980	9.198	2949.97	石嘴山	106.383	38.9832	25.79	2564	45	503	35.67	87	4100	180	40000		石嘴山	106.383	38.9832	40	0.39	2380.8	45.5	118.2	42.1	102.8	4095.33	4095.33	3224385	322.438	70865.6		石嘴山	23.3	14.8	51.8	2.8	45
吴忠	西北	106.198	37.9975	60	10	1112	6.91		6.91	6	11516.7	48830	4.883	7066.57	吴忠	106.198	37.9975	10.26	1316	36	20.98	17.29	20.98	8241.18	90	25000		吴忠	106.198	37.9975	1875	39.06	1307.41	39.99	60	20.32	48	4233.33	4233.33	1137852	113.785	28453.4		吴 忠	19.2	15.1	67.9	2.2	45
乌鲁木齐	西北	87.6168	43.8256	1266	19.7812	835	107.02		104.69	64	16357.8	665655	66.5655	6219.91	乌鲁木齐	87.6168	43.8256	25.44	14206	231	265	219.48	261.88	8380.94	562.5	24350.6		乌鲁木齐	87.6168	43.8256	14837	37.95	13787.9	256.76	391.2	256.76	391.2	6563.39	6563.39	21836674	2183.67	85047		乌鲁木齐	23.1	12.6	44.6	2.8	45
克拉玛依	西北	84.8892	45.5799	208	4.52174	9500	19.76		19.76	46	4295.65	305740	30.574	15472.7	克拉玛依	84.8892	45.5799	36.21	9608	25	49.36	24.91	49.36	5046.6	385.7	154280		克拉玛依	84.8892	45.5799	2745	42.89	7735.2	29.03	63.94	27.47	63.94	4296.22	4296.22	8531091	853.109	293872		克拉玛依	26.8	13.2	37.5	3	45
拉萨	西南	91.1721	29.6525	563	13	868	12.54		10.69	45	2375.56	490254	49.0254	39095.2	拉萨	91.1721	29.6525	20.23	245	18	245	17.9	58.8	3044.22	100	55555.6		拉萨	91.1721	29.6525	1903	28.83	1480	33.29	297	28.14	93.49	3009.95	3009.95	2240263	224.026	67295.4		拉萨	15.1	11	64.1	1.3	45
		114.04	33.6172	878.682	17.9237	1631.43	77.6356		58.3702	45.3631	12013.3	383474	38.3474	5806.99		114.04	33.6172	32.2355	3054.64	172.212	557.433	118.867	117.876	9629.84	785.728	53105.7	#DIV/0!	#DIV/0!	114.04	33.6172	6445.84	38.7601	2622.6	189.972	573.154	136.612	160.128	7777.9	7777.9	1.58393e+07	1583.93	68682.6	90851	#DIV/0!	25.9045	25.7117	75.7749	2.23073	45
[truncated: 18 more columns]

## Sheet: 2005
	XX	YY	cover	市区面积_x000D_（平方公里） Urban_x000D_ District_x000D_ Area	市区人口（万人）_x000D_ Urban_x000D_ District_x000D_ Population	城区面积（平方公里）_x000D_ Urban_x000D_ Area	城区人口_x000D_（万人） Urban_x000D_ Population	建成区_x000D_ 面积_x000D_（平方公里） Area of_x000D_ Built_x000D_ District		GDP(亿元)	人均GDP(万元)
北京	116.407	39.9042	38.11	16410	1633	12187	1379.9	1289.32	北京	6886.3	45444
天津	117.201	39.0842	36.4	7399	786	2236.12	548.18	571.53	天津	3697.6	35783
石家庄	114.515	38.0423	32.8	456	238	212.54	204.08	186.74	石家庄	1786.8	18671
唐山	118.18	39.6309	43.65	3874	301	1230.2	191.47	209.11	唐山	2027.6	28006
秦皇岛	119.6	39.9354	42.36	363	81	363.2	80.6	87.48	秦皇岛	491.2	17171
邯郸	114.539	36.6257	42.97	956	184	434	145.6	103.91	邯郸	1157.3	13410
邢台	114.505	37.0706	32.51	132	59	114.8	58.2	70	邢台	680.8	10041
保定	115.465	38.8744	36.27	312	106	312.3	106.07	103	保定	1072.1	10021
张家口	114.886	40.7675	33.78	819	89	376.27	81.5	76.82	张家口	415.8	9947
承德	117.963	40.9529	31.65	939	52	524.75	44.82	80.73	承德	360.3	10723
沧州	116.839	38.3045	30	183	51	183	51	42.86	沧州	1130.8	16581
廊坊	116.684	39.538	43.17	960	79	292	41.7	54.08	廊坊	621.2	15727
衡水	115.67	37.7389	30.09	592	47	273.4	35.42	43.9	衡水	519.7	12344
太原	112.549	37.8706	36.15	1460	277	1103.3	263.8	238	太原	893.2	26107
大同	113.3	40.0768	28.82	2080	151	96.7	117.3	91.2	大同	370.3	11913
阳泉	113.581	37.857	33.01	652	67	43.05	53.43	43.05	阳泉	205.4	15811
长治	113.116	36.1954	43.87	334	70	334	70.23	45.3	长治	398.7	12363
晋城	112.852	35.4907	31	2165	215	147	32	31	晋城	316	14356
朔州	112.433	39.3316	37.28	4499	59	148	25.78	31.7	朔州	181.7	12094
忻州	112.734	38.4167	11	1982	52	183	21.63	20.1	忻州	167.2	5519
临汾	111.519	36.088	25.78	1316	75	37.4	42.9	37.4	临汾	523.2	12741
运城	111.008	35.0264	10	640	53	44.5	37	30	运城	470.8	9473
呼和浩特	111.749	40.8426	26.05	17224	114	2054	107.65	150	呼和浩特	743.7	29049
包头	109.84	40.6574	41.08	27768	248	2591	138.24	180	包头	848.7	35086
乌海	106.794	39.6554	18.55	1754	44	1754	43.56	37.51	乌海	125.5	27272
赤峰	118.887	42.2578	24.27	7078	119	503	72.25	75.9	赤峰	347.6	7894
乌兰察布	112.708	37.6978	24.63	56039	30	114.2	29.44	35	乌兰察布	230.2	10592
通辽	122.243	43.6529	27.55	3212	44	51.7	44.13	35.3	通辽	329.3	10616
呼伦贝尔	119.736	49.2122	31.29	1351	26	135	25.53	28	呼伦贝尔	324.1	11971
巴彦淖尔	122.093	46.0727	24.55	2354	53	668	29.5	32.38	巴彦淖尔	217	12560
鄂尔多斯	109.963	39.8225	14.14	2685	46	625	24.34	99.68	鄂尔多斯	594.8	40169
沈阳	123.431	41.8057	40.65	3495	505	1506.8	431.86	347	沈阳	2084.1	29935
大连	121.615	38.914	42.77	2568	293	1037.57	277.7	258	大连	2152.2	38196
鞍山	122.994	41.1086	36.39	624	350	624.29	147.35	143.96	鞍山	1018	29338
抚顺	123.957	41.8809	35.86	765	140	537.75	130.48	121.56	抚顺	390.2	17372
本溪	123.685	41.487	42.01	1518	96	661.95	85.46	106.5	本溪	343.3	21922
丹东	124.354	40.0008	35.72	835	76	223.21	61.81	53.4	丹东	326.3	13502
锦州	121.127	41.0957	36.87	729	96	436	92	65.45	锦州	381.9	12397
营口	122.235	40.667	34.1	701	101	183.72	87.32	93.65	营口	379.6	16487
阜新	121.67	42.0216	43.33	468	193	448	78	67	阜新	142.6	7398
辽阳	123.237	41.2672	34.65	574	73	573.81	72.51	91.56	辽阳	330.1	18135
盘锦	122.071	41.12	36.94	266	59	266	59.44	57.64	盘锦	441.3	34641
铁岭	123.726	42.2238	35.41	660	46	203.65	40.26	43.96	铁岭	264.2	8764
朝阳	120.449	41.5737	26.21	1141	61	533	50.4	32	朝阳	212.2	6280
葫芦岛	120.728	40.6148	43.55	2301	41	575	41	67.18	葫芦岛	299.5	10960
长春	125.324	43.8171	41.47	4789	358	302.14	251.67	284.76	长春	1508.6	20728
吉林	126.55	43.8379	40.92	1995	182	1042.75	126.44	165.63	吉林	629.7	14498
四平	124.35	43.1664	18.86	640	57	550	55	39	四平	330.7	10027
辽源	125.144	42.8878	21.5	438	49	42	45	42	辽源	137.1	11083
通化	125.94	41.7284	34.16	761	45	761	45.43	46.81	通化	233.6	10258
白城	122.839	45.6196	17.39	2525	51	912	25.9	38.11	白城	152.2	7550
白山	129.844	42.968	19.92	151	62	132.54	41.6	41.8	白山	160.5	12139
松原	126.05	44.9884	44.58	1325	41	1000	39.1	36.93	松原	365.6	13175
哈尔滨	126.535	45.8038	27.49	7086	475	336.01	400.14	336.01	哈尔滨	1830.5	18821
齐齐哈尔	123.918	47.3543	43.68	4365	143	134.79	108.37	134.79	齐齐哈尔	422.4	8003
鸡西	130.969	45.2951	32.11	2300	89	79.23	73.72	79.23	鸡西	204.6	10616
鹤岗	130.298	47.3499	40.37	4551	68	85	58.81	43	鹤岗	112.6	10246
双鸭山	131.159	46.6465	31.11	1760	50	118	45.5	58.8	双鸭山	146.6	9728
大庆	125.104	46.5893	31	5107	128	185.17	102.54	169.4	大庆	1400.7	53199
伊春	128.841	47.7275	22.82	12910	81	159.16	75.47	159.16	伊春	115.9	8974
佳木斯	130.319	46.7998	39.97	1875	83	1073.9	60.6	59.84	佳木斯	241.5	9812
七台河	131.003	45.7717	9.44	1767	53	62.37	36.5	62.37	七台河	100.2	11351
牡丹江	129.633	44.5517	45.73	2285	90	86.3	68.84	64.4	牡丹江	302.8	11285
绥化	126.969	46.6538	32.18	2743	89	51.79	30	30	绥化	350.8	6244
黑河	127.528	50.2451	11.05	14444	20	18.5	13.4	18.5	黑河	120.5	6911
上海	121.474	31.2304	37.23	6341	1858	6340.5	1858.08	885.67	上海	9154.2	51474
南京	118.797	32.0603	44.91	4733	534	2414.44	466.75	577.44	南京	2411.1	40887
无锡	120.312	31.4912	40	1623	236	1622.64	235.92	203	无锡	2804.7	62323
徐州	117.284	34.2058	36.3	514	192	360.5	131.78	177.4	徐州	1212.2	13160
常州	119.974	31.8112	38.91	1872	225	384.38	122.39	112.5	常州	1303.4	37207
苏州	120.585	31.299	40.19	1650	235	674.6	195.41	228.31	苏州	4026.5	66766
南通	120.894	31.9802	41.77	355	87	141.52	65.27	61.36	南通	1472.1	19060
连云港	119.222	34.5967	36.95	925	82	621.82	69.7	90	连云港	456	9691
淮安	119.035	33.6319	37.12	3137	95	227	95	95	淮安	561.8	10683
盐城	120.164	33.3473	37.42	1862	159	218.28	58.44	78	盐城	1004.9	12585
扬州	119.413	32.3942	40.37	973	118	202.95	67.87	72	扬州	922	20251
镇江	119.426	32.1878	38.72	1083	103	555.43	86.45	94.3	镇江	871.7	32597
泰州	119.923	32.4555	39.9	420	65	325.74	57.63	56	泰州	822.3	16366
宿迁	118.275	33.9632	39.53	2108	157	220.01	41.09	50.2	宿迁	375.9	7188
杭州	120.155	30.2741	37.31	3327	417	923.97	254.6	344.48	杭州	2942.7	44853
宁波	121.544	29.8683	37.32	2634	218	777.97	138.7	221.4	宁波	2449.3	44156
温州	120.699	27.9938	24.19	1187	142	397	104.15	153	温州	1596.4	21335
嘉兴	120.759	30.7539	28.9	1022	87	209.46	37.06	78.5	嘉兴	1159.7	34706
湖州	120.087	30.8943	37.79	1566	104	625.87	55.7	71.7	湖州	644.3	25030
绍兴	120.586	29.9958	45.1	362	65	226.04	52.53	90.1	绍兴	1447.5	33283
金华	119.647	29.0792	35.77	2044	92	379.64	45.41	68.79	金华	1063.5	23482
衢州	118.859	28.9701	40.14	2354	81	200.1	27.82	44.7	衢州	329.1	13401
丽水	119.923	28.4676	23.62	1502	38	266.13	18.69	26	丽水	306	12189
台州	120.681	30.5107	17.24	1536	151	749.98	100.52	113.87	台州	1251.8	22438
舟山	122.207	29.9853	34.4	1028	69	408.52	36.51	49.17	舟山	280.2	28936
合肥	117.227	31.8206	30.08	596	479	224.74	198.39	224.74	合肥	853.6	19225
芜湖	118.433	31.3529	32.79	720	105	230	95.23	117.56	芜湖	400.7	18065
蚌埠	117.39	32.9163	27.94	602	92	284.6	76.92	93.47	蚌埠	311.3	9465
淮南	117	32.6255	26.73	1566	179	1091	101.19	94.6	淮南	263.6	11551
马鞍山	118.507	31.6705	42.06	340	62	105.85	49.6	69.9	马鞍山	371.3	30001
淮北	116.798	33.9558	42.23	294	108	136	79.41	61.19	淮北	209	10252
铜陵	117.811	30.9455	50.33	227	44	180.6	38.83	45	铜陵	182	25854
安庆	117.115	30.5319	38.29	821	74	311.39	57.46	63.09	安庆	429.6	7331
黄山	118.338	29.7147	45.44	2361	43	445.8	24.44	34.2	黄山	160	11254
阜阳	115.814	32.8901	9.48	1844	198	332.67	68.16	60.67	阜阳	324.6	3761
六安	116.522	31.7337	22.39	3583	182	136.12	29.24	44.06	六安	312.8	5076
宿州	116.964	33.6464	30.84	2868	178	164.51	42.02	41.5	宿州	313	5416
滁州	118.328	32.2534	27.3333	1404	53	282.6	29.5	42.56	滁州	328.1	7942
巢湖	117.89	31.6245	24.43	2082	87	145	27	36.3	巢湖	301.9	7136
亳州	115.779	33.8446	19.31	2226	152	56.52	23.38	32	亳州	265	5093
宣城	108.636	24.4852	30.79	2533	85	131.17	17.08	26.51	宣城	251.5	9572
池州	117.567	30.6872	31.33	2432	65	250.81	19.29	25	池州	110.2	7378
福州	119.296	26.0745	32.05	1786	186	1043	185.92	170.46	福州	1476.3	22301
厦门	118.089	24.4798	36.67	1569	167	220	114.16	180	厦门	1006.6	44737
莆田	119.008	25.4541	36.63	2284	207	241.25	44.95	48.8	莆田	359.9	12854
三明	117.639	26.2634	42.5	1178	28	220	24.9	23.6	三明	392.8	14909
泉州	118.676	24.8741	51.92	892	774	529	66.7	77	泉州	1626.3	21427
漳州	117.647	24.513	43.22	401	54	95.24	36.94	46.77	漳州	628.5	13402
南平	118.178	26.6418	35.1	2660	49	370.47	20.79	20.13	南平	348	12083
龙岩	117.018	25.0751	36.1	2678	47	185	28.69	33.3	龙岩	385.6	14105
宁德	119.548	26.6656	34.42	1537	43	107.5	15.3	17.07	宁德	343.6	11266
南昌	115.858	28.6829	47.81	622	215	210	202.3	180	南昌	1007.7	22390
景德镇	117.178	29.2688	42.29	580	45	160	44.96	72	景德镇	193.1	12596
萍乡	113.855	27.6228	31.72	1065	83	85.7	35	41	萍乡	228.1	12559
九江	116.002	29.7051	36.04	1572	93	105.64	60.22	80.14	九江	428.9	9231
新余	114.917	27.8178	41.34	1789	82	160	32.7	44	新余	177.3	15935
鹰潭	117.069	28.2602	35	167	20	87.65	12.31	30.74	鹰潭	123.5	11452
上饶	117.943	28.4549	31.17	339	38	44.9	23.4	25.5	上饶	388.1	6130
吉安	114.965	27.0876	24.59	1382	52	210.8	27.9	38.06	吉安	303.1	6477
赣州	114.935	25.8318	24.65	528	59	50	45.86	50	赣州	500.1	6134
宜春	114.417	27.8157	41.37	2532	101	72.59	26.2	32.2	宜春	372.2	6995
抚州	115.546	28.0559	31.93	2153	140	81.3	40.8	42.05	抚州	262	6894
济南	117.12	36.6512	39.14	3257	353	1195	280	315.3	济南	1876.6	31606
青岛	120.383	36.0671	38.73	1403	276	1403.15	275.53	250.69	青岛	2695.8	33188
淄博	118.055	36.8135	38.3	2970	277	578.06	141.09	202.92	淄博	1431	32533
枣庄	117.324	34.8105	28.54	3093	215	163.18	75.88	103.7	枣庄	633.4	17602
东营	118.675	37.4348	36.04	3294	83	1087	58.22	92.82	东营	1166.1	64906
烟台	121.448	37.4638	39.36	2726	180	639.36	126.55	195.22	烟台	2012.5	30923
潍坊	119.162	36.707	37.32	1993	154	1687.7	137.86	128	潍坊	1471.2	17279
济宁	116.587	35.415	44.4	1043	109	480	56.68	60.12	济宁	1266.3	15749
泰安	117.088	36.2003	41.1	2087	160	271.22	58.63	97.4	泰安	855.7	15547
德州	116.357	37.4341	38.67	539	59	539	59.39	46	德州	831.8	15097
威海	122.12	37.5131	45.11	769	63	221	46.29	109	威海	1169.8	47028
莱芜	117.768	35.909	38.98	2246	125	442.85	47.96	56.5	莱芜	256.3	20616
滨州	117.971	37.382	19.04	1042	63	534.54	49.09	74	滨州	667.3	18030
聊城	115.985	36.457	36.62	1254	104	412.69	57	59.9	聊城	693.1	12727
临沂	118.356	35.1047	36.11	1761	196	1003.25	137.58	118.89	临沂	1211.8	12498
菏泽	115.481	35.2338	36.04	1415	146	359.54	65.83	57.46	菏泽	450.8	5104
日照	119.527	35.4167	41.24	1915	122	362	54.65	65.28	日照	426.5	15858
郑州	113.625	34.7466	34.9	1010	319	431.43	269.59	320.66	郑州	1660.6	25474
开封	114.308	34.7973	28.06	546	85	86	84.23	86	开封	408	8570
洛阳	112.454	34.6197	38	544	161	144.92	151.18	144.92	洛阳	1112.4	17383
平顶山	113.193	33.7662	27.49	443	99	80	88.25	61	平顶山	561	11407
安阳	114.392	36.0976	34.49	544	106	203	69	73	安阳	557.5	10472
鹤壁	114.297	35.7472	37.5	609	56	96	40.19	45	鹤壁	186.2	12976
新乡	113.927	35.3031	40.9	346	100	99	72.12	90.92	新乡	544.2	9876
焦作	113.242	35.2159	39.66	424	82	90	74.9	78	焦作	584	17145
濮阳	115.029	35.7618	40.14	263	66	50	41	36	濮阳	384	10754
许昌	113.852	34.0358	42.68	97	48	97	40.45	63	许昌	605.5	13468
漯河	114.017	33.5809	39.72	1020	134	106.82	46.98	51.3	漯河	322.1	12759
三门峡	111.2	34.7728	25.21	185	29	30	25.95	28	三门峡	335.2	15124
商丘	115.656	34.415	23.14	1697	150	103	93	58.5	商丘	560.8	6879
周口	114.697	33.6261	27.15	269	45	100	23.5	42	周口	595.5	5579
驻马店	114.022	33.0115	26.89	770	65	49.7	31.06	48.2	驻马店	500.4	6010
南阳	112.528	32.9907	31.28	1988	170	215.48	92.01	81.26	南阳	1053.4	9826
信阳	114.091	32.147	28.59	3672	142	182.3	44.8	52	信阳	508.6	6476
武汉	114.305	30.5931	37.64	8494	828	2718	451.61	222.3	武汉	2238	26238
黄石	115.039	30.2	39.1	237	68	237	67.8	62	黄石	343.2	14358
十堰	110.798	32.6294	42.21	1193	52	319	47.1	57.6	十堰	306.6	8922
宜昌	111.286	30.692	40.13	4232	124	541	69.02	72.54	宜昌	608.1	15253
襄樊	112.122	32.009	42.31	1187	89	337.8	74.9	78.42	襄樊	601.5	10407
鄂州	114.895	30.3919	31.26	1594	107	240.67	39	46.2	鄂州	147	13908
荆门	112.199	31.0354	44.75	2391	58	194	30.44	44.6	荆门	310.3	10528
随州	113.382	31.6902	28.6	6989	160	216	29.57	42	随州	193.1	8701
孝感	113.957	30.9178	41.09	1020	88	87.1	27.86	32	孝感	360.2	7661
咸宁	114.322	29.8414	26.84	1500	56	58	25.12	30.8	咸宁	203.8	7372
荆州	113.423	30.3609	27.55	1576	121	64.03	65.8	64.03	荆州	393	6141
黄冈	114.879	30.434	31.11	376	37	28.32	26.1	27.56	黄冈	348.6	4799
长沙	112.939	28.2282	36.41	556	219	556.33	218.75	181.23	长沙	1519.5	23968
株洲	113.134	27.828	36.11	537	79	470.33	60.44	89.58	株洲	524.1	14497
湘潭	112.944	27.8297	43.7	279	72	278.77	71.89	70	湘潭	366.8	13604
衡阳	112.572	26.8934	34.51	509	95	120	90.44	93	衡阳	590.9	8899
邵阳	111.468	27.2389	20.07	436	66	60	58.85	45	邵阳	360.1	5399
岳阳	113.129	29.3568	39.87	1247	85	131.3	60.5	78.59	岳阳	634.9	12532
益阳	112.355	28.5539	32.71	1852	131	66.3	43.1	48.6	益阳	294.8	7130
常德	111.698	29.0317	38.59	2748	139	336.54	55.49	71.83	常德	634.2	11811
娄底	111.993	27.7001	35.78	426	44	50	31.98	40.6	娄底	311.5	8193
郴州	113.015	25.7705	37.19	2246	68	59.6	32.85	40.7	郴州	477.7	11073
永州	111.613	26.4204	34.6	3180	115	76.41	39.37	53.3	永州	361.2	7139
怀化	110.002	27.5695	32.34	518	35	52	28.5	32.82	怀化	295.2	6564
张家界	110.479	29.1171	21.37	2571	50	142.48	19.3	21.45	张家界	110.6	7588
广州	113.264	23.1291	36.38	3848	637	3848.43	636.76	843.7	广州	5154.2	53809
韶关	113.598	24.8103	32.26	3416	72	1937.68	55.03	78.3	韶关	339.9	11708
深圳	114.058	22.5431	38.77	1953	862	1952.84	861.55	764	深圳	4950.9	60801
珠海	113.577	22.271	40.83	1688	96	1110.13	68.88	118.34	珠海	635	45284
汕头	116.682	23.3541	34.83	1956	494	168.48	223	168.48	汕头	651.4	13196
佛山	113.121	23.0215	34.6	3869	361	530.41	122.13	142.91	佛山	2383.2	41266
江门	113.082	22.5791	40.53	1818	136	574.46	88.39	108.62	江门	805.4	19636
湛江	110.359	21.2707	43.99	1460	148	73.35	147.38	73.35	湛江	658.1	9899
茂名	110.925	21.663	38.11	907	126	109.5	44.4	65.58	茂名	808.2	13934
惠州	114.416	23.1123	32.43	4060	171	1839	112.37	110.15	惠州	803.4	21896
肇庆	112.465	23.0472	37.77	761	52	393.08	42.98	67.9	肇庆	450.6	12315
潮州	116.623	23.6567	39.47	152	39	49.98	38.62	41.68	潮州	287.6	11422
梅州	116.122	24.2886	28.29	322	31	32.89	31.08	32.89	梅州	314.5	7666
中山	113.393	22.517	36.19	761	150	290.02	36.24	85.6	中山	880.2	36208
东莞	113.752	23.0207	14.52	2465	729	2465	728.8	681.86	东莞	2181.6	33263
汕尾	115.375	22.7862	31.38	415	48	94.21	23	13.2	汕尾	211	7608
河源	114.701	23.7437	65.85	450	30	25.96	23.46	25.96	河源	204.9	7488
阳江	111.982	21.858	24.89	7813	265	160	39.6	38.1	阳江	295.3	12758
清远	113.056	23.6818	33.3	927	60	927.2	60	40.94	清远	323	9070
南宁	108.367	22.817	32.29	6569	260	793.47	159.51	179.06	南宁	723.4	11057
柳州	109.428	24.326	32.17	658	102	437.11	95.04	112.5	柳州	512	14399
桂林	110.18	25.2345	40.29	565	76	565	75.69	58.88	桂林	531.8	10753
梧州	111.279	23.477	35.9	1097	39	307	36.15	36.1	梧州	228.4	7512
北海	109.12	21.4813	48.07	957	58	957	56.7	40.75	北海	181.6	12225
玉林	110.165	22.6364	22.92	1251	94	219.04	42.22	50.5	玉林	356.3	5999
百色	106.618	23.9023	38.12	3702	34	362	16.23	31.14	百色	239.4	6415
河池	108.085	24.6929	29.63	2340	33	80	19.96	16.92	河池	207	5405
钦州	108.654	21.9799	18.06	4767	128	229.98	24.69	84.66	钦州	205.5	6000
贵港	109.599	23.1115	49.29	3533	182	301.5	36.97	51.25	贵港	227	4800
海口	110.198	20.044	35.24	2304	134	209.36	80.9	91.42	海口	311.8	21473
三亚	109.512	18.2528	50.9	1919	54	60	25.7	20	三亚	74.2	14559
成都	104.067	30.5728	35.6	2131	503	779.01	386.28	408.66	成都	2370.8	19627
重庆	106.552	29.563	22.31	26041	1540	5577.55	765.48	667.45	重庆	3070.5	10982
自贡	104.778	29.339	38.02	1438	148	325.8	70.49	50.09	自贡	274	9924
攀枝花	101.719	26.5823	41.6	2018	69	329	56.88	54	攀枝花	248	21969
泸州	105.442	28.8718	31.37	2132	144	410.38	61.07	47.95	泸州	284	6753
德阳	104.398	31.1269	39.38	1093	65	168.33	40.85	40.2	德阳	462.2	12593
绵阳	104.679	31.4675	33.62	1570	119	362.1	73	80.48	绵阳	482.5	9774
广元	105.843	32.4354	21.79	4535	92	216.7	29.54	31.82	广元	145.2	5268
遂宁	105.593	30.5328	21.31	1875	150	373.98	42.49	43.54	遂宁	206.6	5789
内江	105.058	29.5802	16.22	1569	141	204.09	49.21	32.92	内江	254.8	6432
乐山	103.766	29.5521	23.61	2514	115	92.83	48.54	48.24	乐山	306.7	9116
宜宾	104.643	28.7518	30.27	1123	79	52.71	35.85	45.2	宜宾	370	7890
南充	106.111	30.8378	34.78	2527	191	420	69	61.23	南充	335.3	5409
达州	107.512	31.1961	17.7	451	41	89	30.52	20.01	达州	342.6	6063
雅安	107.468	31.2096	25.14	1070	35	28.5	21.12	20.13	雅安	126.5	8310
眉山	103.485	29.6012	25.16	1331	84	56	30.37	39.4	眉山	245.1	8012
贵阳	106.63	26.6477	40.98	2408	206	414.77	178.88	132	贵阳	525.6	14934
六盘水	104.83	26.5927	5.02	488	44	129	26	37	六盘水	207.6	6879
遵义	106.927	27.7257	45.14	1316	82	220	70	50.18	遵义	407.6	5497
安顺	105.948	26.2531	15.63	1710	88	109.48	40.32	29.1	安顺	106	4026
昆明	102.833	24.8801	26.08	4061	306	472.57	217.09	253.3	昆明	1061.6	17560
丽江	100.268	25.6065	18.85	1255	15	22	10.5	18.4	丽江	60.3	5048
昭通	103.717	27.3383	9.7	2240	80	90	23.51	22.5	昭通	167.2	3327
玉溪	102.527	24.3473	38.16	1004	41	46.7	13.7	22.3	玉溪	368.2	16728
曲靖	103.796	25.49	13.95	1553	68	33.7	33.18	33.7	曲靖	441	7842
保山	99.1618	25.112	10	5011	88	33	15	18.6	保山	117.4	4826
西安	108.94	34.3416	30.43	3582	641	313.8	331.25	267.91	西安	1270.1	15859
铜川	108.945	34.8968	24.17	2406	76	55	39.2	36.54	铜川	69.5	8384
宝鸡	107.238	34.3632	41.59	3574	138	63.62	63.8	63.5	宝鸡	415.8	11065
咸阳	108.709	34.3296	29.43	156	108	75.93	83.91	70.51	咸阳	432.5	8700
延安	109.49	36.5854	20.5	3541	42	43.25	24.46	24.16	延安	370.6	17531
汉中	107.023	33.0675	18.45	556	82	38	53	28	汉中	216.6	6205
渭南	109.51	34.5	24.36	1221	92	153	38.68	36.5	渭南	312.4	5713
榆林	109.735	38.2854	18.92	7053	60	119	24	36	榆林	320	9723
安康	109.029	32.6847	33.21	140	60	27.2	25	27.2	安康	137	5191
兰州	103.834	36.0611	34.97	1647	221	185.91	183.63	175.81	兰州	567	18296
嘉峪关	98.2892	39.7731	31.51	1350	18	120	16.37	40.7	嘉峪关	81.3	44674
金昌	102.188	38.5201	22.89	3019	20	42	15.06	31.58	金昌	115.9	24950
白银	104.139	36.545	20.59	3478	48	90.18	34.5	41	白银	146.5	8395
天水	105.725	34.5809	32.55	412	124	58.61	63.34	46.12	天水	146.2	4189
平凉	106.665	35.5431	23.46	1936	49	255	23.75	36	平凉	110.2	4915
武威	102.638	37.9283	21.39	5081	195	24.64	22.5	24.64	武威	141.8	7322
张掖	100.45	38.9259	18.31	4200	51	26.91	14.96	26.91	张掖	110.8	8651
酒泉	98.4944	39.7328	28.15	3349	44	66.6	21.3	29	酒泉	146	14937
西宁	101.778	36.6171	30.13	380	107	380	83.66	64.92	西宁
银川	106.231	38.4872	24.15	2311	86	1773.5	86.08	107	银川
石嘴山	106.383	38.9832	25.79	2564	45	503	35.67	87	石嘴山
吴忠	106.198	37.9975	10.26	1316	36	20.98	17.29	20.98	吴忠
乌鲁木齐	87.6168	43.8256	25.44	14206	231	265	219.48	261.88	乌鲁木齐	562.5	25507
克拉玛依	84.8892	45.5799	36.21	9608	25	49.36	24.91	49.36	克拉玛依	385.7	88562
拉萨	91.1721	29.6525	20.23	245	18	245	17.9	58.8

## Sheet: Year 1990
No.	City name	longitude	latitude	urban vegetation cover(%)	Urban population(104)	Built-up area（km2）	Population density(n/km2)	GDP	Per capita GDP
1	Beijing	116.407	39.9042	26.0403	576.96	397	14533	4920524	7683.28
2	Tianjin	117.201	39.0842	4.09552	457.47	335	13655.8	2787934	5719.89
3	Shijiazhuang	114.515	38.0423	9.02353	106.84	85	12569.4	615091	5251.35
4	Tangshan	118.18	39.6309	15.875	104.42	112	9323.21	594975	4111.21
5	Qinhuangdao	119.6	39.9354	17.1695	36.49	59	6184.75	329802	6786.05
6	Xingtai	114.505	37.0706	12.5652	30.28	23	13165.2	160136	5070.8
7	Baoding	115.465	38.8744	8.80392	48.32	51	9474.51	281605	5327.37
8	Zhangjiakou	114.886	40.7675	10.0833	52.91	60	8818.33	266165	4752.95
9	Chengde	117.963	40.9529	34.6667	24.68	18	13711.1	115321	4111.27
10	Cangzhou	116.839	38.3045	7.08333	24.27	24	10112.5	105256	3623.27
11	Langfang	116.684	39.538	9.8	14.81	20	7405	83939	2357.17
12	Hengshui	115.67	37.7389	24.09	25.42	35.9	7080.78	479.7	9344
13	Taiyuan	112.549	37.8706	22.0833	153.39	168	9130.36	837089	5115.74
14	Datong	113.3	40.0768	23.5614	79.83	57	14005.3	449804	5634.52
15	Yangquan	113.581	37.857	12.0333	36.23	30	12076.7	162219	3859.6
16	Changzhi	113.116	36.1954	11.8485	32.11	33	9730.3	196024	3679.13
17	Linfen	111.519	36.088	21.7143	18.73	21	8919.05	79680	4254.14
18	Yuncheng	111.008	35.0264	2.06667	10.84	15	7226.67	94481	8715.96
19	Huhehaote	111.749	40.8426	25.2329	65.25	73	8938.36	279801	3954.23
20	Baotou	109.84	40.6574	26.1844	98.35	141	6975.18	423771	4000.86
21	Chifeng	118.887	42.2578	24.0294	35.01	34	10297.1	192941	3036.05
22	Jining	112.708	37.6978	9.42105	16.35	19	8605.26	38077	2328.87
23	Tongliao	122.243	43.6529	19.88	25.51	25	10204	121411	4759.35
24	Hailadong	119.736	49.2122	10.2857	18.07	28	6453.57	46855	2592.97
25	Wulanhaote	122.093	46.0727	18.7857	15.95	14	11392.9	37181	2331.1
26	Dongsheng	109.963	39.8225	10.3333	7.82	9	8688.89	47275	6045.4
27	Shenyang	123.431	41.8057	20.2012	360.37	164	21973.8	1996195	5293.54
28	Dalian	121.615	38.914	23.4504	172.33	131	13155	1477897	6612.81
29	Anshan	122.994	41.1086	27.7386	120.4	88	13681.8	826001	5656.38
30	Benxi	123.685	41.487	34.7971	76.88	69	11142	393874	4212.56
31	Dandong	124.354	40.0008	32.38	52.37	50	10474	266520	2791.66
32	Jinzhou	121.127	41.0957	19.9792	56.95	48	11864.6	362115	3988.05
33	Yingkou	122.235	40.667	16	42.16	43	9804.65	185886	2569.26
34	Fuxin	121.67	42.0216	23.3061	63.55	49	12969.4	170187	2163.58
35	Chaoyang	120.449	41.5737	23.8333	22.24	18	12355.6	101740	1471.93
36	Xingcheng	120.728	40.6148	8.33333	10.24	18	5688.89	78953	1489.68
37	Changchun	125.324	43.8171	35.4211	167.93	114	14730.7	625815	2689.36
38	Jilin	126.55	43.8379	24.8485	103.69	99	10473.7	610048	3295.06
39	Siping	124.35	43.1664	19.1852	31.72	27	11748.1	123286	1369.84
40	Tonghua	125.94	41.7284	26.7727	32.46	22	14754.5	107456	1227.79
41	Baicheng	122.839	45.6196	23.5455	21.8	22	9909.09	74715	3427.29
42	Tumen	129.844	42.968	6.6	9.12	10	9120	33478	3670.83
43	Hadongbin	126.535	45.8038	21	244.34	156	15662.8	1157819	4209.64
44	Qiqihadong	123.918	47.3543	17.4608	107.01	102	10491.2	352893	1847.8
45	Jixi	130.969	45.2951	10.8413	68.39	63	10855.6	189587	2506.77
46	Hegang	130.298	47.3499	5.01818	52.27	55	9503.64	123897	1814.01
47	Yichun	128.841	47.7275	4.47328	79.58	131	6074.81	155532	1893.73
48	Jiamusi	130.319	46.7998	24.5532	49.34	47	10497.9	199306	1788.94
49	Mudanjiang	129.633	44.5517	14.85	57.17	40	14292.5	249400	1749.68
50	Suihua	126.969	46.6538	5.95652	22.79	23	9908.7	126653	5557.39
51	Heihe	127.528	50.2451	9.44444	8.78	9	9755.56	46842	5335.08
52	Shanghai	121.474	31.2304	11.72	749.65	250	29986	6095117	7050.78
53	Nanjing	118.797	32.0603	35.2481	209.02	129	16203.1	1485123	6287.03
54	Xuzhou	117.284	34.2058	14.371	80.57	62	12995.2	414456	2997.66
55	Changzhou	119.974	31.8112	8.79487	53.15	39	13628.2	420608	5167.17
56	Nantong	120.894	31.9802	14	34.33	27	12714.8	344182	2243.84
57	Huaiyin	119.035	33.6319	27.125	23.97	24	9987.5	142121	1255.49
58	Hangzhou	120.155	30.2741	11.4058	109.97	69	15937.7	983815	5821.39
59	Wenzhou	120.699	27.9938	5.48148	40.19	27	14885.2	249782	2541.53
60	Jinhua	119.647	29.0792	10	14.43	12	12025	109122	2278.12
61	Quzhou	118.859	28.9701	1.9375	11.24	16	7025	107604	3710.48
62	Lishui	119.923	28.4676	15.5714	6.92	7	9885.71	52694	7614.74
63	Hefei	117.227	31.8206	23.6286	73.33	70	10475.7	388937	3921.92
64	Wuhu	118.433	31.3529	23.1034	42.57	29	14679.3	190420	3175.25
65	Bangbu	117.39	32.9163	21.8889	44.92	36	12477.8	197765	3086.22
66	Huangshan	118.338	29.7147	23.1667	10.26	12	8550	69805	3272.62
67	Fuyang	115.814	32.8901	30.1875	17.96	16	11225	69618	3876.28
68	Liuan	116.522	31.7337	18.3333	14.42	18	8011.11	39439	2735.02
69	Suzhou	116.964	33.6464	9.05556	15.19	18	8438.89	31984	2105.6
70	Chuzhou	118.328	32.2534	27.0909	12.53	11	11390.9	117104	9345.89
71	Chaohu	117.89	31.6245	7.3	12.37	10	12370	84824	6857.24
72	Bozhou	115.779	33.8446	4.22222	10.63	9	11811.1	135172	12716.1
73	Fuzhou	119.296	26.0745	16.14	87.48	50	17496	562730	4553.2
74	Xiamen	118.089	24.4798	24.3023	38.68	43	8995.35	536485	12435.9
75	Zhangzhou	117.647	24.513	41	18.14	11	16490.9	103128	1724.84
76	Nanping	118.178	26.6418	26.1905	19.51	21	9290.48	137335	7039.21
77	Longyan	117.018	25.0751	21.1	13.45	20	6725	122376	9098.59
78	Ningde	119.548	26.6656	0.384615	6.4	13	4923.08	40414	6314.69
79	Nanchang	115.858	28.6829	19.0769	108.61	65	16709.2	408936	2989.3
80	Jingdezhen	117.178	29.2688	28.2333	28.12	30	9373.33	103090	2345.09
81	Jiujiang	116.002	29.7051	34.9355	29.12	31	9393.55	132813	1865.61
82	Jian	114.965	27.0876	33.6154	14.86	13	11430.8	53835	3622.81
83	Ganzhou	114.935	25.8318	36.375	22.01	16	13756.3	72921	3313.08
84	Yichun	114.417	27.8157	15.8	15.16	15	10106.7	103407	6821.04
85	Zhangshu	115.546	28.0559	3	9.38	7	13400	80154	8545.2
86	Jinan	117.12	36.6512	26.875	145.92	104	14030.8	1042431	6488.03
87	Qingdao	120.383	36.0671	21.9787	145.92	94	15523.4	1037005	6161.28
88	Zibo	118.055	36.8135	24.8488	113.81	86	13233.7	1044552	10465.4
89	Dongying	118.675	37.4348	2.64286	28.17	28	10060.7	619292	18306
90	Yantai	121.448	37.4638	30.4615	45.21	39	11592.3	393650	2777.66
91	Weifang	119.162	36.707	18.6571	42.85	35	12242.9	363730	3844.52
92	Taian	117.088	36.2003	27	35.07	20	17535	268479	2818.68
93	Dezhou	116.357	37.4341	17.4815	19.55	27	7240.74	120170	6146.8
94	Weihai	122.12	37.5131	28.3333	12.9	15	8600	171260	6674.2
95	Linyi	118.356	35.1047	20.0588	32.47	17	19100	310758	9570.62
96	Heze	115.481	35.2338	29.5333	18.93	15	12620	142991	7553.67
97	Rizhao	119.527	35.4167	25.1538	18.5	13	14230.8	194873	10533.7
98	Zhengzhou	113.625	34.7466	25.5625	115.97	112	10354.5	515897	3582.62
99	Kaifeng	114.308	34.7973	16.3488	50.78	43	11809.3	172779	2467.21
100	Luoyang	112.454	34.6197	19.9318	75.98	44	17268.2	447687	4187.12
101	Anyang	114.392	36.0976	18.0667	42.03	30	14010	2224888	33952.2
102	Xinxiang	113.927	35.3031	26.6	47.38	40	11845	188540	2362.36
103	Xuchang	113.852	34.0358	33.0556	20.88	18	11600	108509	2836.84
104	Sanmenxia	111.2	34.7728	24.8333	12.05	12	10041.7	52899	1460.49
105	Zhumadian	114.022	33.0115	13.8333	12.32	12	10266.7	61894	5023.86
106	Nanyang	112.528	32.9907	25.75	24.33	20	12165	121215	4982.12
107	Xinyang	114.091	32.147	7.94444	19.25	18	10694.4	55101	2862.39
108	Wuhan	114.305	30.5931	23.5714	328.42	189	17376.7	1534921	4098.92
109	Huangshi	115.039	30.2	18.5667	45.76	30	15253.3	200472	3685.82
110	Yichang	111.286	30.692	25.6552	37.16	29	12813.8	192227	5172.95
111	Jingmen	112.199	31.0354	24.6154	21.05	26	8096.15	240406	11420.7
112	Changsha	112.939	28.2282	24.297	111.32	101	11021.8	582404	4074.46
113	Zhuzhou	113.134	27.828	27.28	41.49	50	8298	293969	4232.81
114	Hengyang	112.572	26.8934	17.1304	48.71	46	10589.1	213751	2136.01
115	Shaoyang	111.468	27.2389	18.2778	24.72	18	13733.3	112359	1634.79
116	Yueyang	113.129	29.3568	9.83721	30.28	43	7041.86	249938	3511.35
117	Changde	111.698	29.0317	15.4348	30.13	23	13100	307104	3604.93
118	Chenzhou	113.015	25.7705	26.4	17.88	20	8940	100448	5617.9
119	Guangzhou	113.264	23.1291	19.2747	291.43	182	16012.6	3181136	37624.3
120	Shen圳	114.058	22.5431	37.2174	35.07	69	5082.61	1354952	61870
121	Shantou	116.682	23.3541	26.6774	57.86	31	18664.5	372408	3819.18
122	Foshan	113.121	23.0215	25.1304	30.32	23	13182.6	450041	4822.04
123	Zhanjiang	110.359	21.2707	23.4444	40.1	36	11138.9	400654	6321.46
124	Huizhou	114.416	23.1123	27.3571	16.1	14	11500	149669	1777.96
125	Meizhou	116.122	24.2886	18.6667	13.22	12	11016.7	71897	898.712
126	Shanwei	115.375	22.7862	0.428571	10.78	7	15400	58550	1262.4
127	Yangjiang	111.982	21.858	26.25	21.52	8	26900	97921	2358.97
128	Nanning	108.367	22.817	28.8143	72.19	70	10312.9	381114	4474.74
129	Liuzhou	109.428	24.326	30.0469	60.93	64	9520.31	395830	5618.59
130	Guilin	110.18	25.2345	28.2222	36.41	36	10113.9	187031	4452.06														成都	104.067	30.5728	21246	40.16	2130	564.94	779.77	451.85	528.9	8543.2	64815506	6481.55	114730
131	Wuzhou	111.279	23.477	25.9231	21.25	13	16346.2	107403	4172.61														重庆	106.552	29.563	46452	41.66	29591.7	1793.16	6133.93	885.05	1114.92	7938.24	96228100	9622.81	53664
132	Beihai	109.12	21.4813	20.3077	11.29	13	8684.62	74980	2819.86														攀枝花	101.719	26.5823	3014	43.68	2017.05	68.71	326.66	56.55	69.38	8150.76	5889422	588.942	85714.2
133	Yulin	110.165	22.6364	4.27273	14.45	11	13136.4	155279	10746														泸州	105.442	28.8718	4358	39.98	2132	149.52	411.38	94.78	109.37	8666	5875464	587.546	39295.5
134	Baise	106.618	23.9023	2.84615	9.04	13	6953.85	48829	5401.44														绵阳	104.679	31.4675	4190	38.09	1570	125.44	465	82.85	110	7531.82	6995952	699.595	55771.3
135	Hechi	108.085	24.6929	9.54545	8.04	11	7309.09	46455	5777.99														广元	105.843	32.4354	1859	37.18	4535	93.48	216.7	35.29	50.43	6997.82	2478856	247.886	26517.5
136	Qinzhou	108.654	21.9799	15.2857	11.46	7	16371.4	113097	9868.85														遂宁	105.593	30.5328	2471	32.51	1876	152.75	298.62	63.67	75.9	8388.67	2999645	299.964	19637.6
137	Haikou	110.198	20.044	18.4	28.02	25	11208	222528	7941.76														内江	105.058	29.5802	2509	43.26	1569	142.77	240	60.2	58.01	10377.5	3907583	390.758	27369.8
138	Sanya	109.512	18.2528	9.5	10.28	16	6425	58232	5664.59														乐山	103.766	29.5521	2389	35.13	2514	116.12	166.73	48.82	68.01	7178.36	5559975	555.997	47881.3
139	Chengdong	104.067	30.5728	19.5287	171.33	87	19693.1	1185642	4723.86														宜宾	104.643	28.7518	3010	32.02	2561.42	120.27	103.75	57.2	93.52	6116.34	5579072	557.907	46387.9
140	Zhongqing	106.552	29.563	16.2989	226.68	87	26055.2	1063660	2885.6														南充	106.111	30.8378	4469	41	2527	196.65	420	93	109	8532.11	4764981	476.498	24230.8
141	Panzhihua	101.719	26.5823	28.0238	41.55	42	9892.86	254181	5672.42														达州	107.512	31.1961	1579	42.68	3462	182.81	159	59.49	68	8748.53	1834866	183.487	10037
142	泸zhou	105.442	28.8718	25.3333	26.29	15	17526.7	103457	1825.6														雅安	107.468	31.2096	1213	41.83	1684.27	62.7	196.89	24.66	29.2	8445.21	1698163	169.816	27083.9
143	Mianyang	104.679	31.4675	21.56	26.29	25	10516	73289	1111.28														眉山	103.485	29.6012	1717	38.16	1331	87.2	56.5	30.67	45.2	6785.4	2938832	293.883	33702.2
144	Guangyuan	105.843	32.4354	4.46429	18.22	28	6507.14	82620	2326.01														贵阳	106.63	26.6477	13007	36	2407.87	236.84	414.77	195.46	299	6537.12	15913553	1591.36	67191.2
145	Suining	105.593	30.5328	6.25	14.61	8	18262.5	118902	3840.5														遵义	106.927	27.7257	2682	31.19	1316	92	220	75.89	63.25	11998.4	4434100	443.41	48196.7
146	Neijiang	105.058	29.5802	16	25.6	16	16000	128070	1361.72														安顺	105.948	26.2531	938	22.88	1704	86.89	109.48	46.65	40.8	11433.8	1671381	167.138	19235.6
147	Leshan	103.766	29.5521	12.1	34.11	20	17055	198248	2207.91														昆明	102.833	24.8801	15600	39.29	3842.3	309.45	1749	229.56	407.37	5635.17	26878600	2687.86	86859.3
148	Yibin	104.643	28.7518	28.6154	24.1	13	18538.5	113217	4697.8														丽江	100.268	25.6065	941	40.91	1255	18.48	26	12.98	23.2	5594.83	831077	83.1077	44971.7
149	Nanchong	106.111	30.8378	8.27273	18.03	11	16390.9	85736	4755.19														昭通	103.717	27.3383	1152	31.14	2240	85.8	61	24.73	37.1	6665.77	1876332	187.633	21868.7
150	Daxian	107.512	31.1961	7.4	18.81	10	18810	67958	3612.87														玉溪	102.527	24.3473	1080	30	1004	49.53	88.12	23.9	36.43	6560.53	5835964	583.596	117827
151	Yaan	107.468	31.2096	29.4286	9.85	7	14071.4	53283	5409.44														保山	99.1618	25.112	712	26.37	5011	94.3	60	26.1	26.5	9849.06	1680006	168.001	17815.5
152	Dongmeishan	103.485	29.6012	11.7143	9.46	7	13514.3	68709	6870.9														拉萨	91.1721	29.6525	1903	28.83	1480	33.29	297	28.14	93.49	3009.95	2240263	224.026	67295.4
153	Guiyang	106.63	26.6477	40.0353	101.86	85	11983.5	514883	5054.81														南昌	115.858	28.6829	10582	42.33	820.36	226.36	330	223.74	249.5	8967.54	22550663	2255.07	99623
154	Zunyi	106.927	27.7257	19.75	26.19	12	21825	151806	5796.33														景德镇	117.178	29.2688	4055	51.33	580	48.86	198.5	48.65	78.68	6183.27	3520255	352.026	72047.8
155	Anshun	105.948	26.2531	10.1	17.41	10	17410	75867	4357.67														九江	116.002	29.7051	5200	52	699	65.4	104.85	62.82	100.23	6267.58	6786152	678.615	103764
156	Kunming	102.833	24.8801	3.73958	112.89	96	11759.4	819435	5867.36														吉安	114.965	27.0876	2843	56.86	1381.53	57.2	228.7	35.7	50.03	7135.72	1736079	173.608	30351
157	Dali	100.268	25.6065	9.75	13.66	8	17075	109857	8042.24														赣州	114.935	25.8318	3672	38.65	528.28	66.21	112.12	64.6	95	6800	3947742	394.774	59624.6
158	Zhaotong	103.717	27.3383	3.25	8.9	4	22250	91161	10242.8														宜春	114.417	27.8157	2801	43.09	2532.36	110.68	88	42.49	65	6536.92	1887900	188.79	17057.3
159	Yuxi	102.527	24.3473	7.33333	6.54	6	10900	290937	44485.8														抚州	115.546	28.0559	2731	48.77	2153.3	118.11	85.3	50.69	56.48	8974.86	2947773	294.777	24957.9
160	Baoshan	99.1618	25.112	10.5	6.44	4	16100	63383	9842.08														郑州	113.625	34.7466	12677	33.1	1010.3	517.08	439.07	326.01	382.66	8519.57	33357336	3335.73	64511
161	Xian	108.94	34.3416	25.6667	195.9	138	14195.7	197252	869.028														开封	114.308	34.7973	3679	32.56	546	104.51	121.25	87.29	98.86	8829.66	3525997	352.6	33738.4
162	Tongchuan	108.945	34.8968	18.3333	28.07	18	15594.4	230250	6786.03														洛阳	112.454	34.6197	7148	37.23	593.5	215	331.42	203	191.85	10581.2	12236651	1223.67	56914.7
163	Baoji	107.238	34.3632	21.1111	33.78	27	12511.1	197252	3181.48														安阳	114.392	36.0976	3095	28.14	543.6	112.82	153	71.15	79	9006.33	4538105	453.81	40224.3
164	Yanan	109.49	36.5854	5.77778	11.33	9	12588.9	43755	3861.87														新乡	113.927	35.3031	4492	40.84	346	113	140	75.9	110.1	6893.73	5685015	568.501	50309.9
165	Hanzhong	107.023	33.0675	5.8125	16.99	16	10618.7	82827	4875.04														许昌	113.852	34.0358	3289	35.75	97	41.85	97	41.85	84	4982.14	2976705	297.671	71128
166	Yulin	109.735	38.2854	1.64286	7.71	14	5507.14	30627	3972.37														三门峡	111.2	34.7728	1304	43.47	185	32	30	29	30	9666.67	1547888	154.789	48371.5
167	Ankang	109.029	32.6847	2.21739	14.22	23	6182.61	81817	5753.66														驻马店	114.022	33.0115	2795	40.51	1365.1	82.27	185	42.96	69	6226.09	2656403	265.64	32288.8
168	Lanzhou	103.834	36.0611	12.6503	119.46	163	7328.83	641477	5047.03														南阳	112.528	32.9907	3753	25.19	2142.75	211.07	640.77	121.17	148.99	8132.76	5943473	594.347	28158.8
169	Tianshui	105.725	34.5809	6.79167	24.5	24	10208.3	143499	4176.34														信阳	114.091	32.147	3563	42.42	3604	153.1	259.51	47.1	84	5607.14	4086167	408.617	26689.5
170	Pingliang	106.665	35.5431	25.625	9.83	8	12287.5	32215	3277.21														武汉	114.305	30.5931	20758	38.87	8494.41	821.71	888.42	495.75	543.28	9125.13	72667200	7266.72	88434.1
171	Wuwei	102.638	37.9283	7.8	13.31	10	13310	74258	5579.11														黄石	115.039	30.2	2802	31.84	237	71.9	237	71.9	87.61	8206.83	5609400	560.94	78016.7
172	Zhangye	100.45	38.9259	0.1875	8.38	16	5237.5	66013	7877.45														宜昌	111.286	30.692	6295	41.14	4232	142.34	541	75.12	152.6	4922.67	12486218	1248.62	87721.1
173	Jiuquan	98.4944	39.7328	27.125	7.1	8	8875	47220	6650.7														荆门	112.199	31.0354	2144	39.7	2391	70.77	194	41.21	54.05	7624.42	4276900	427.69	60433.8
174	Xining	101.778	36.6171	9.05769	55.18	52	10611.5	162693	2567.35														长沙	112.939	28.2282	11206	34.37	1007.66	316.53	1007.66	316.53	287.51	11009.4	45049425	4504.94	142323
175	Yinchuan	106.231	38.4872	4.64865	35.59	37	9618.92	188544	4776.89														株洲	113.134	27.828	5500	41.35	873	120.54	837	105.4	132.63	7946.92	9569404	956.94	79387.8
176	Shizuishan	106.383	38.9832	17.0714	25.79	42	6140.48	91980	2949.97														衡阳	112.572	26.8934	5163	32.47	578	116.98	123.68	102	114.3	8923.88	6360218	636.022	54370.1
177	Wuzhong	106.198	37.9975	10	6.91	6	11516.7	48830	7066.57														邵阳	111.468	27.2389	2017	36.02	436	76.2	67	67.11	56	11983.9	2342414	234.241	30740.3
178	Wulumuqi	87.6168	43.8256	19.7812	104.69	64	16357.8	665655	6219.91														岳阳	113.129	29.3568	3709	42.15	1254	93.5	155	63.9	88	7261.36	10310437	1031.04	110272
179	Kelamayi	84.8892	45.5799	4.52174	19.76	46	4295.65	305740	15472.7														常德	111.698	29.0317	3734	43.42	2510	148	339.16	65.35	85.92	7605.91	10685731	1068.57	72200.9
180	Lasa	91.1721	29.6525	13	10.69	45	2375.56	490254	39095.2														郴州	113.015	25.7705	2770	38.47	2246	76.8	580	53.56	73.05	7331.96	4892407	489.241	63703.2

## Sheet: Year 2005
No.	City name	longitude	latitude	urban vegetation cover(%)	Urban population(104)	Built-up area（km2）	Population density(n/km2)	GDP	Per capita GDP
1	Beijing	116.407	39.9042	38.11	1379.9	1289.32	10702.5	6886.3	42169.6
2	Tianjin	117.201	39.0842	36.4	548.18	571.53	9591.45	3697.6	47043.3
3	Shijiazhuang	114.515	38.0423	32.8	204.08	186.74	10928.6	1786.8	75075.6
4	Tangshan	118.18	39.6309	43.65	191.47	209.11	9156.42	2027.6	67362.1
5	Qinhuangdao	119.6	39.9354	42.36	80.6	87.48	9213.53	491.2	60642
6	Xingtai	114.505	37.0706	32.51	58.2	70	8314.29	680.8	115390
7	Baoding	115.465	38.8744	36.27	106.07	103	10298.1	1072.1	101142
8	Zhangjiakou	114.886	40.7675	33.78	81.5	76.82	10609.2	415.8	46719.1
9	Chengde	117.963	40.9529	31.65	44.82	80.73	5551.84	360.3	69288.5
10	Cangzhou	116.839	38.3045	30	51	42.86	11899.2	1130.8	221725
11	Langfang	116.684	39.538	43.17	41.7	54.08	7710.8	621.2	78632.9
12	Hengshui	115.67	37.7389	30.09	35.42	43.9	8068.34	519.7	12344
13	Taiyuan	112.549	37.8706	36.15	263.8	238	11084	893.2	32245.5
14	Datong	113.3	40.0768	28.82	117.3	91.2	12861.8	370.3	24523.2
15	Yangquan	113.581	37.857	33.01	53.43	43.05	12411.1	205.4	30656.7
16	Changzhi	113.116	36.1954	43.87	70.23	45.3	15503.3	398.7	56957.1
17	Linfen	111.519	36.088	25.78	42.9	37.4	11470.6	523.2	69760
18	Yuncheng	111.008	35.0264	10	37	30	12333.3	470.8	88830.2
19	Huhehaote	111.749	40.8426	26.05	107.65	150	7176.67	743.7	65236.8
20	Baotou	109.84	40.6574	41.08	138.24	180	7680	848.7	34221.8
21	Chifeng	118.887	42.2578	24.27	72.25	75.9	9519.1	347.6	29210.1
22	Jining	112.708	37.6978	24.63	29.44	35	8411.43	230.2	76733.3
23	Tongliao	122.243	43.6529	27.55	44.13	35.3	12501.4	329.3	74840.9
24	Hailadong	119.736	49.2122	31.29	25.53	28	9117.86	324.1	124654
25	Wulanhaote	122.093	46.0727	24.55	29.5	32.38	9110.56	217	40943.4
26	Dongsheng	109.963	39.8225	14.14	24.34	99.68	2441.81	594.8	129304
27	Shenyang	123.431	41.8057	40.65	431.86	347	12445.5	2084.1	41269.3
28	Dalian	121.615	38.914	42.77	277.7	258	10763.6	2152.2	73453.9
29	Anshan	122.994	41.1086	36.39	147.35	143.96	10235.5	1018	29085.7
30	Benxi	123.685	41.487	42.01	85.46	106.5	8024.41	343.3	35760.4
31	Dandong	124.354	40.0008	35.72	61.81	53.4	11574.9	326.3	42934.2
32	Jinzhou	121.127	41.0957	36.87	92	65.45	14056.5	381.9	39781.2
33	Yingkou	122.235	40.667	34.1	87.32	93.65	9324.08	379.6	37584.2
34	Fuxin	121.67	42.0216	43.33	78	67	11641.8	142.6	7388.6
35	Chaoyang	120.449	41.5737	26.21	50.4	32	15750	212.2	34786.9
36	Xingcheng	120.728	40.6148	43.55	41	67.18	6103.01	299.5	73048.8
37	Changchun	125.324	43.8171	41.47	251.67	284.76	8837.97	1508.6	42139.7
38	Jilin	126.55	43.8379	40.92	126.44	165.63	7633.88	629.7	34598.9
39	Siping	124.35	43.1664	18.86	55	39	14102.6	330.7	58017.5
40	Tonghua	125.94	41.7284	34.16	45.43	46.81	9705.19	233.6	51911.1
41	Baicheng	122.839	45.6196	17.39	25.9	38.11	6796.12	152.2	29843.1
42	Tumen	129.844	42.968	19.92	41.6	41.8	9952.15	160.5	25887.1
43	Hadongbin	126.535	45.8038	27.49	400.14	336.01	11908.6	1830.5	38536.8
44	Qiqihadong	123.918	47.3543	43.68	108.37	134.79	8039.91	422.4	29538.5
45	Jixi	130.969	45.2951	32.11	73.72	79.23	9304.56	204.6	22988.8
46	Hegang	130.298	47.3499	40.37	58.81	43	13676.7	112.6	16558.8
47	Yichun	128.841	47.7275	22.82	75.47	159.16	4741.77	115.9	14308.6
48	Jiamusi	130.319	46.7998	39.97	60.6	59.84	10127	241.5	29096.4
49	Mudanjiang	129.633	44.5517	45.73	68.84	64.4	10689.4	302.8	33644.4
50	Suihua	126.969	46.6538	32.18	30	30	10000	350.8	39415.7
51	Heihe	127.528	50.2451	11.05	13.4	18.5	7243.24	120.5	60250
52	Shanghai	121.474	31.2304	37.23	1858.08	885.67	20979.4	9154.2	49269.1
53	Nanjing	118.797	32.0603	44.91	466.75	577.44	8083.09	2411.1	45151.7
54	Xuzhou	117.284	34.2058	36.3	131.78	177.4	7428.41	1212.2	63135.4
55	Changzhou	119.974	31.8112	38.91	122.39	112.5	10879.1	1303.4	57928.9
56	Nantong	120.894	31.9802	41.77	65.27	61.36	10637.2	1472.1	169207
57	Huaiyin	119.035	33.6319	37.12	95	95	10000	561.8	59136.8
58	Hangzhou	120.155	30.2741	37.31	254.6	344.48	7390.85	2942.7	70568.3
59	Wenzhou	120.699	27.9938	24.19	104.15	153	6807.19	1596.4	112423
60	Jinhua	119.647	29.0792	35.77	45.41	68.79	6601.25	1063.5	115598
61	Quzhou	118.859	28.9701	40.14	27.82	44.7	6223.71	329.1	40629.6
62	Lishui	119.923	28.4676	23.62	18.69	26	7188.46	306	80526.3
63	Hefei	117.227	31.8206	30.08	198.39	224.74	8827.53	853.6	17820.5
64	Wuhu	118.433	31.3529	32.79	95.23	117.56	8100.54	400.7	38161.9
65	Bangbu	117.39	32.9163	27.94	76.92	93.47	8229.38	311.3	33837
66	Huangshan	118.338	29.7147	45.44	24.44	34.2	7146.2	160	37209.3
67	Fuyang	115.814	32.8901	9.48	68.16	60.67	11234.5	324.6	16393.9
68	Liuan	116.522	31.7337	22.39	29.24	44.06	6636.4	312.8	17186.8
69	Suzhou	116.964	33.6464	30.84	42.02	41.5	10125.3	313	17584.3
70	Chuzhou	118.328	32.2534	27.3333	29.5	42.56	6931.39	328.1	61905.7
71	Chaohu	117.89	31.6245	24.43	27	36.3	7438.02	301.9	34701.1
72	Bozhou	115.779	33.8446	19.31	23.38	32	7306.25	265	17434.2
73	Fuzhou	119.296	26.0745	32.05	185.92	170.46	10907	1476.3	79371
74	Xiamen	118.089	24.4798	36.67	114.16	180	6342.22	1006.6	60275.4
75	Zhangzhou	117.647	24.513	43.22	36.94	46.77	7898.23	628.5	116389
76	Nanping	118.178	26.6418	35.1	20.79	20.13	10327.9	348	71020.4
77	Longyan	117.018	25.0751	36.1	28.69	33.3	8615.62	385.6	82042.6
78	Ningde	119.548	26.6656	34.42	15.3	17.07	8963.09	343.6	79907
79	Nanchang	115.858	28.6829	47.81	202.3	180	11238.9	1007.7	46869.8
80	Jingdezhen	117.178	29.2688	42.29	44.96	72	6244.44	193.1	42911.1
81	Jiujiang	116.002	29.7051	36.04	60.22	80.14	7514.35	428.9	46118.3
82	Jian	114.965	27.0876	24.59	27.9	38.06	7330.53	303.1	58288.5
83	Ganzhou	114.935	25.8318	24.65	45.86	50	9172	500.1	84762.7
84	Yichun	114.417	27.8157	41.37	26.2	32.2	8136.65	372.2	36851.5
85	Zhangshu	115.546	28.0559	31.93	40.8	42.05	9702.73	262	18714.3
86	Jinan	117.12	36.6512	39.14	280	315.3	8880.43	1876.6	53161.5
87	Qingdao	120.383	36.0671	38.73	275.53	250.69	10990.9	2695.8	97673.9
88	Zibo	118.055	36.8135	38.3	141.09	202.92	6952.99	1431	51660.6
89	Dongying	118.675	37.4348	36.04	58.22	92.82	6272.36	1166.1	140494
90	Yantai	121.448	37.4638	39.36	126.55	195.22	6482.43	2012.5	111806
91	Weifang	119.162	36.707	37.32	137.86	128		1471.2	95532.5
92	Taian	117.088	36.2003	41.1	58.63	97.4		855.7	53481.2
93	Dezhou	116.357	37.4341	38.67	59.39	46		831.8	140983
94	Weihai	122.12	37.5131	45.11	46.29	109		1169.8	185683
95	Linyi	118.356	35.1047	36.11	137.58	118.89		1211.8	61826.5
96	Heze	115.481	35.2338	36.04	65.83	57.46		450.8	30876.7
97	Rizhao	119.527	35.4167	41.24	54.65	65.28		426.5	34959
98	Zhengzhou	113.625	34.7466	34.9	269.59	320.66		1660.6	52056.4
99	Kaifeng	114.308	34.7973	28.06	84.23	86		408	48000
100	Luoyang	112.454	34.6197	38	151.18	144.92		1112.4	69093.2
101	Anyang	114.392	36.0976	34.49	69	73		557.5	52594.3
102	Xinxiang	113.927	35.3031	40.9	72.12	90.92		544.2	54420
103	Xuchang	113.852	34.0358	42.68	40.45	63		605.5	126146
104	Sanmenxia	111.2	34.7728	25.21	25.95	28		335.2	115586
105	Zhumadian	114.022	33.0115	26.89	31.06	48.2		500.4	76984.6
106	Nanyang	112.528	32.9907	31.28	92.01	81.26		1053.4	61964.7
107	Xinyang	114.091	32.147	28.59	44.8	52		508.6	35816.9
108	Wuhan	114.305	30.5931	37.64	451.61	222.3		2238	27029
109	Huangshi	115.039	30.2	39.1	67.8	62		343.2	50470.6
110	Yichang	111.286	30.692	40.13	69.02	72.54		608.1	49040.3
111	Jingmen	112.199	31.0354	44.75	30.44	44.6	6825.11	310.3	53500
112	Changsha	112.939	28.2282	36.41	218.75	181.23	12070.3	1519.5	69383.6
113	Zhuzhou	113.134	27.828	36.11	60.44	89.58	6747.04	524.1	66341.8
114	Hengyang	112.572	26.8934	34.51	90.44	93	9724.73	590.9	62200
115	Shaoyang	111.468	27.2389	20.07	58.85	45	13077.8	360.1	54560.6
116	Yueyang	113.129	29.3568	39.87	60.5	78.59	7698.18	634.9	74694.1
117	Changde	111.698	29.0317	38.59	55.49	71.83	7725.18	634.2	45625.9
118	Chenzhou	113.015	25.7705	37.19	32.85	40.7	8071.25	477.7	70250
119	Guangzhou	113.264	23.1291	36.38	636.76	843.7	7547.23	5154.2	80913.7
120	Shen圳	114.058	22.5431	38.77	861.55	764	11276.8	4950.9	57435
121	Shantou	116.682	23.3541	34.83	223	168.48	13236	651.4	13186.2
122	Foshan	113.121	23.0215	34.6	122.13	142.91	8545.94	2383.2	66016.6
123	Zhanjiang	110.359	21.2707	43.99	147.38	73.35	20092.7	658.1	44466.2
124	Huizhou	114.416	23.1123	32.43	112.37	110.15	10201.5	803.4	46982.5
125	Meizhou	116.122	24.2886	28.29	31.08	32.89	9449.68	314.5	101452
126	Shanwei	115.375	22.7862	31.38	23	13.2	17424.2	211	43958.3
127	Yangjiang	111.982	21.858	24.89	39.6	38.1	10393.7	295.3	11143.4
128	Nanning	108.367	22.817	32.29	159.51	179.06	8908.19	723.4	27823.1
129	Liuzhou	109.428	24.326	32.17	95.04	112.5	8448	512	50196.1
130	Guilin	110.18	25.2345	40.29	75.69	58.88	12855	531.8	69973.7
131	Wuzhou	111.279	23.477	35.9	36.15	36.1	10013.9	228.4	58564.1
132	Beihai	109.12	21.4813	48.07	56.7	40.75	13914.1	181.6	31310.3
133	Yulin	110.165	22.6364	22.92	42.22	50.5	8360.4	356.3	37904.3
134	Baise	106.618	23.9023	38.12	16.23	31.14	5211.95	239.4	70411.8
135	Hechi	108.085	24.6929	29.63	19.96	16.92	11796.7	207	62727.3
136	Qinzhou	108.654	21.9799	18.06	24.69	84.66	2916.37	205.5	16054.7
137	Haikou	110.198	20.044	35.24	80.9	91.42	8849.27	311.8	23268.7
138	Sanya	109.512	18.2528	50.9	25.7	20	12850	74.2	13740.7
139	Chengdong	104.067	30.5728	35.6	386.28	408.66	9452.36	2370.8	47133.2
140	Zhongqing	106.552	29.563	22.31	765.48	667.45	11468.7	3070.5	19938.3
141	Panzhihua	101.719	26.5823	41.6	56.88	54	10533.3	248	35942
142	泸zhou	105.442	28.8718	31.37	61.07	47.95	12736.2	284	19722.2
143	Mianyang	104.679	31.4675	33.62	73	80.48	9070.58	482.5	40546.2
144	Guangyuan	105.843	32.4354	21.79	29.54	31.82	9283.47	145.2	15782.6
145	Suining	105.593	30.5328	21.31	42.49	43.54	9758.84	206.6	13773.3
146	Neijiang	105.058	29.5802	16.22	49.21	32.92	14948.4	254.8	18070.9
147	Leshan	103.766	29.5521	23.61	48.54	48.24	10062.2	306.7	26669.6
148	Yibin	104.643	28.7518	30.27	35.85	45.2	7931.42	370	46835.4
149	Nanchong	106.111	30.8378	34.78	69	61.23	11269	335.3	17555
150	Daxian	107.512	31.1961	17.7	30.52	20.01	15252.4	342.6	83561
151	Yaan	107.468	31.2096	25.14	21.12	20.13	10491.8	126.5	36142.9
152	Dongmeishan	103.485	29.6012	25.16	30.37	39.4	7708.12	245.1	29178.6
153	Guiyang	106.63	26.6477	40.98	178.88	132	13551.5	525.6	25514.6
154	Zunyi	106.927	27.7257	45.14	70	50.18	13949.8	407.6	49707.3
155	Anshun	105.948	26.2531	15.63	40.32	29.1	13855.7	106	12045.5
156	Kunming	102.833	24.8801	26.08	217.09	253.3	8570.47	1061.6	34692.8
157	Dali	100.268	25.6065	18.85	10.5	18.4	5706.52	60.3	40200
158	Zhaotong	103.717	27.3383	9.7	23.51	22.5	10448.9	167.2	20900
159	Yuxi	102.527	24.3473	38.16	13.7	22.3	6143.5	368.2	89804.9
160	Baoshan	99.1618	25.112	10	15	18.6	8064.52	117.4	13340.9
161	Xian	108.94	34.3416	30.43	331.25	267.91	12364.2	1270.1	19814.4
162	Tongchuan	108.945	34.8968	24.17	39.2	36.54	10728	69.5	9144.74
163	Baoji	107.238	34.3632	41.59	63.8	63.5	10047.2	415.8	30130.4
164	Yanan	109.49	36.5854	20.5	24.46	24.16	10124.2	370.6	88238.1
165	Hanzhong	107.023	33.0675	18.45	53	28	18928.6	216.6	26414.6
166	Yulin	109.735	38.2854	18.92	24	36	6666.67	320	53333.3
167	Ankang	109.029	32.6847	33.21	25	27.2	9191.18	137	22833.3
168	Lanzhou	103.834	36.0611	34.97	183.63	175.81	10444.8	567	25656.1
169	Tianshui	105.725	34.5809	32.55	63.34	46.12	13733.7	146.2	11790.3
170	Pingliang	106.665	35.5431	23.46	23.75	36	6597.22	110.2	22489.8
171	Wuwei	102.638	37.9283	21.39	22.5	24.64	9131.49	141.8	7271.79
172	Zhangye	100.45	38.9259	18.31	14.96	26.91	5559.27	110.8	21725.5
173	Jiuquan	98.4944	39.7328	28.15	21.3	29	7344.83	146	33181.8
174	Xining	101.778	36.6171	30.13	83.66	64.92	12886.6	320	29906.5
175	Yinchuan	106.231	38.4872	24.15	86.08	107	8044.86	360	41860.5
176	Shizuishan	106.383	38.9832	25.79	35.67	87	4100	180	40000
177	Wuzhong	106.198	37.9975	10.26	17.29	20.98	8241.18	90	25000
178	Wulumuqi	87.6168	43.8256	25.44	219.48	261.88	8380.94	562.5	24350.6
179	Kelamayi	84.8892	45.5799	36.21	24.91	49.36	5046.6	385.7	154280
180	Lasa	91.1721	29.6525	20.23	17.9	58.8	3044.22	100	55555.6

## Sheet: Year 2015
No.	City name	longitude	latitude	urban vegetation cover(%)	Urban population(104)	Built-up area（km2）	Population density(n/km2)	GDP	Per capita GDP
1	Beijing	116.407	39.9042	51.1	1825.1	1306.45	13969.9	19213.2	90851
2	Tianjin	117.201	39.0842	35.4	608.15	747.26	8138.4	13146.6	159992
3	Shijiazhuang	114.515	38.0423	42.89	233.92	216.5	10804.6	1704.41	68754
4	Tangshan	118.18	39.6309	41.14	193.48	249	7770.28	2488.59	81646.7
5	Qinhuangdao	119.6	39.9354	56.1	88.03	97.26	9051	624.664	70960.3
6	Xingtai	114.505	37.0706	37.42	86.8	79.21	10958.2	263.287	30332.6
7	Baoding	115.465	38.8744	41.41	108.92	144.22	7552.35	767.867	70498.2
8	Zhangjiakou	114.886	40.7675	41.45	84.8	86	9860.47	445.415	49162.8
9	Chengde	117.963	40.9529	41.02	51.78	114.36	4527.81	268.367	45432
10	Cangzhou	116.839	38.3045	36.88	52.03	63.69	8169.26	614.037	98608.8
11	Langfang	116.684	39.538	44.15	45.5	64.5	7054.26	487.644	58865.8
12	Hengshui	115.67	37.7389	41.54	35.19	46.4	7584.05	240.599	46429.8
13	Taiyuan	112.549	37.8706	39.88	295	320	9218.75	2219.08	71124.2
14	Datong	113.3	40.0768	42.73	123.36	108	11422.2	774.236	48263
15	Yangquan	113.581	37.857	41.02	57.67	53.72	10735.3	392.829	57684.1
16	Changzhi	113.116	36.1954	45.56	70.11	59.3	11822.9	346.096	46941
17	Linfen	111.519	36.088	37.91	44.03	54	8153.7	243.022	27516.1
18	Yuncheng	111.008	35.0264	33.85	39	46	8478.26	181.317	27894.9
19	Huhehaote	111.749	40.8426	36.47	124.31	259.07	4798.32	1983.61	135068
20	Baotou	109.84	40.6574	42.31	153	186	8225.81	2941.84	149332
21	Chifeng	118.887	42.2578	38.66	83.6	103.9	8046.2	727.16	56281.7
22	Jining	112.708	37.6978	41.04	26.7	60	4450	154.345	49154.4
23	Tongliao	122.243	43.6529	33.03	46.91	61.2	7665.03	713.749	152153
24	Hailadong	119.736	49.2122	30	27.07	59.46	4552.64	309.009	111034
25	Wulanhaote	122.093	46.0727	38.24	32.5	42	7738.1	264.432	48201.2
26	Dongsheng	109.963	39.8225	42.67	40	112.58	3553.03	880.28	191365
27	Shenyang	123.431	41.8057	42.22	518.28	455	11390.8	5820.49	110953
28	Dalian	121.615	38.914	44.69	301.2	395.5	7615.68	4909.52	162999
29	Anshan	122.994	41.1086	38.7	151.9	167.18	9086.02	1273.4	72844.9
30	Benxi	123.685	41.487	49.74	88.5	109	8119.27	843.455	90103.1
31	Dandong	124.354	40.0008	39.08	60.58	53.4	11344.6	338.374	43132.4
32	Jinzhou	121.127	41.0957	41.77	87.8	77.1	11387.8	632.304	67553.9
33	Yingkou	122.235	40.667	39.38	91.5	109.55	8352.35	863.51	94372.7
34	Fuxin	121.67	42.0216	41.75	77.46	76.5	10125.5	315.577	40740.7
35	Chaoyang	120.449	41.5737	23.88	56.5	43	13139.5	249.582	37531.1
36	Xingcheng	120.728	40.6148	40.86	43.3	80.8	5358.91	362.14	44002.4
37	Changchun	125.324	43.8171	37.18	308.81	452.03	6831.63	3569.3	98109
38	Jilin	126.55	43.8379	43.8	126.11	165.63	7613.96	1476.35	81198.4
39	Siping	124.35	43.1664	33.83	59	54.2	10885.6	268.686	45013.6
40	Tonghua	125.94	41.7284	35.4	44.34	50.33	8809.85	309.175	69728.1
41	Baicheng	122.839	45.6196	28.62	28.26	42.13	6707.81	167.088	32691.7
42	Tumen	129.844	42.968	27.3	37.75	46.74	8076.59	335.834	58223.6
43	Hadongbin	126.535	45.8038	36.06	400.46	390.54	10254	3236.32	68330.1
44	Qiqihadong	123.918	47.3543	37.86	108.2	139.63	7749.05	621.808	44934.8
45	Jixi	130.969	45.2951	40.24	71.39	79.23	9010.48	189.303	22223.8
46	Hegang	130.298	47.3499	33.71	54.9	53.22	10315.7	194.67	29164
47	Yichun	128.841	47.7275	29.27	75.7	167.37	4522.91	181.913	22463.9
48	Jiamusi	130.319	46.7998	41.56	59.9	96.98	6176.53	364	45614
49	Mudanjiang	129.633	44.5517	38.79	70.29	78.05	9005.77	336.937	37956.2
50	Suihua	126.969	46.6538	31.8	32.2	35	9200	112.478	12958.3
51	Heihe	127.528	50.2451	30.16	13.66	20	6830	27.2854	13738.9
52	Shanghai	121.474	31.2304	43.16	2415.15	998.75	24181.7	21339.2	88355.5
53	Nanjing	118.797	32.0603	44.63	567.11	713.29	7950.62	8011.78	124584
54	Xuzhou	117.284	34.2058	39.3	162.22	253	6411.86	2641.76	123916
55	Changzhou	119.974	31.8112	42.8	121.9	185.67	6565.41	3349.68	144545
56	Nantong	120.894	31.9802	42.05	113.04	171.5	6591.25	1908.79	89901.5
57	Huaiyin	119.035	33.6319	40.74	122.21	140	8729.29	1290.92	41792.2
58	Hangzhou	120.155	30.2741	40.27	284.16	462.48	6144.27	6639.86	147552
59	Wenzhou	120.699	27.9938	38	136.44	204.9	6658.86	1578.29	104523
60	Jinhua	119.647	29.0792	37.8	47.02	76.68	6131.98	571.923	60476.1
61	Quzhou	118.859	28.9701	40.9	29.16	66.6	4378.38	437.833	52366.2
62	Lishui	119.923	28.4676	44.3	15.2	33.33	4560.46	249.152	62901.3
63	Hefei	117.227	31.8206	45.3	205.95	393	5240.46	3078.31	131653
64	Wuhu	118.433	31.3529	39.9	105.63	155	6814.84	1269.08	93219
65	Bangbu	117.39	32.9163	38.8	81.96	119.05	6884.5	559.42	54013.7
66	Huangshan	118.338	29.7147	45.9	32.19	59.5	5410.08	215.721	42963.7
67	Fuyang	115.814	32.8901	33.1	74.1	97.55	7596.1	347.966	16027.9
68	Liuan	116.522	31.7337	37.4	37.9	70.2	5398.86	326.044	17270.2
69	Suzhou	116.964	33.6464	38.1	44.07	70	6295.71	414.96	22185.6
70	Chuzhou	118.328	32.2534	39.1	35.72	82.9	4308.81	256.424	47371.9
71	Chaohu	117.89	31.6245	37.6068	30.4	46.8	6495.73	235.298	25410.2
72	Bozhou	115.779	33.8446	39.92	33.5	48.98	6839.53	271.637	16262.8
73	Fuzhou	119.296	26.0745	42.72	192.76	248.12	7768.82	2301.5	118171
74	Xiamen	118.089	24.4798	41.78	159.69	281.6	5670.81	3018.16	153377
75	Zhangzhou	117.647	24.513	41.6	39.29	59.28	6627.87	514.489	89554.2
76	Nanping	118.178	26.6418	47.68	19.37	28.18	6873.67	241.32	48273.7
77	Longyan	117.018	25.0751	42.58	30.55	45	6788.89	568.687	114240
78	Ningde	119.548	26.6656	42.6	18.03	25.3	7126.48	214.665	48943.3
79	Nanchang	115.858	28.6829	42.33	223.74	249.5	8967.54	2255.07	99623
80	Jingdezhen	117.178	29.2688	51.33	48.65	78.68	6183.27	352.026	72047.8
81	Jiujiang	116.002	29.7051	52	62.82	100.23	6267.58	678.615	103764
82	Jian	114.965	27.0876	56.86	35.7	50.03	7135.72	173.608	30351
83	Ganzhou	114.935	25.8318	38.65	64.6	95	6800	394.774	59624.6
84	Yichun	114.417	27.8157	43.09	42.49	65	6536.92	188.79	17057.3
85	Zhangshu	115.546	28.0559	48.77	50.69	56.48	8974.86	294.777	24957.9
86	Jinan	117.12	36.6512	38.96	296	371.67	7964.05	3908.57	109983
87	Qingdao	120.383	36.0671	44.66	318.8	469.56	6789.33	5150.14	140545
88	Zibo	118.055	36.8135	43.98	149.08	250.01	5962.96	2956.51	104707
89	Dongying	118.675	37.4348	42.71	61.48	112.95	5443.12	1996.59	237152
90	Yantai	121.448	37.4638	43.19	139.4	276.45	5042.5	2603.46	143394
91	Weifang	119.162	36.707	40.01	123.35	168.21	7333.1	1247.8	67767.1
92	Taian	117.088	36.2003	44.02	64.5	121.2	5321.78	811.407	50798.6
93	Dezhou	116.357	37.4341	36.34	60.94	107.42	5673.06	542.84	89077.8
94	Weihai	122.12	37.5131	47.95	49.77	142	3504.93	685.107	103490
95	Linyi	118.356	35.1047	41.88	165.67	204.9	8085.41	1377.39	54780.3
96	Heze	115.481	35.2338	40.89	69.7	90	7744.44	441.406	29462.4
97	Rizhao	119.527	35.4167	43	56.03	97.1	5770.34	1166.27	89458.5
98	Zhengzhou	113.625	34.7466	33.1	326.01	382.66	8519.57	3335.73	64511
99	Kaifeng	114.308	34.7973	32.56	87.29	98.86	8829.66	352.6	33738.4
100	Luoyang	112.454	34.6197	37.23	203	191.85	10581.2	1223.67	56914.7
101	Anyang	114.392	36.0976	28.14	71.15	79	9006.33	453.81	40224.3
102	Xinxiang	113.927	35.3031	40.84	75.9	110.1	6893.73	568.501	50309.9
103	Xuchang	113.852	34.0358	35.75	41.85	84	4982.14	297.671	71128
104	Sanmenxia	111.2	34.7728	43.47	29	30	9666.67	154.789	48371.5
105	Zhumadian	114.022	33.0115	40.51	42.96	69	6226.09	265.64	32288.8
106	Nanyang	112.528	32.9907	25.19	121.17	148.99	8132.76	594.347	28158.8
107	Xinyang	114.091	32.147	42.42	47.1	84	5607.14	408.617	26689.5
108	Wuhan	114.305	30.5931	38.87	495.75	543.28	9125.13	7266.72	88434.1
109	Huangshi	115.039	30.2	31.84	71.9	87.61	8206.83	560.94	78016.7
110	Yichang	111.286	30.692	41.14	75.12	152.6	4922.67	1248.62	87721.1
111	Jingmen	112.199	31.0354	39.7	41.21	54.05	7624.42	427.69	60433.8
112	Changsha	112.939	28.2282	34.37	316.53	287.51	11009.4	4504.94	142323
113	Zhuzhou	113.134	27.828	41.35	105.4	132.63	7946.92	956.94	79387.8
114	Hengyang	112.572	26.8934	32.47	102	114.3	8923.88	636.022	54370.1
115	Shaoyang	111.468	27.2389	36.02	67.11	56	11983.9	234.241	30740.3
116	Yueyang	113.129	29.3568	42.15	63.9	88	7261.36	1031.04	110272
117	Changde	111.698	29.0317	43.42	65.35	85.92	7605.91	1068.57	72200.9
118	Chenzhou	113.015	25.7705	38.47	53.56	73.05	7331.96	489.241	63703.2
119	Guangzhou	113.264	23.1291	41	539.29	1023.63	5268.41	14146.5	206537
120	Shen圳	114.058	22.5431	45.08	1062.89	871.19	12200.4	14500.2	136423
121	Shantou	116.682	23.3541	41.88	236.12	247.39	9544.44	1552.58	28751.5
122	Foshan	113.121	23.0215	38.8	134.74	157.28	8566.89	7010.17	183642
123	Zhanjiang	110.359	21.2707	40.73	86.03	107.92	7971.65	1014.47	61401.4
124	Huizhou	114.416	23.1123	36	96.54	237	4073.42	1790.8	128983
125	Meizhou	116.122	24.2886	42.88	40.32	50	8064	329.582	34457.1
126	Shanwei	115.375	22.7862	41.13	21.78	15.67	13899.2	197.469	37982.1
127	Yangjiang	111.982	21.858	36.33	38.01	46.47	8179.47	371.021	54068.9
128	Nanning	108.367	22.817	42.1	198.53	283.02	7014.7	2017.39	72144.9
129	Liuzhou	109.428	24.326	41.47	109.77	177.54	6182.83	1488.07	128593
130	Guilin	110.18	25.2345	42.12	75.8	67.13	11291.5	479.551	62506.7
131	Wuzhou	111.279	23.477	37.49	38.09	37.5	10157.3	378.461	99359.7
132	Beihai	109.12	21.4813	39.07	35.19	71.42	4927.19	567.128	89227.1
133	Yulin	110.165	22.6364	36.28	52.75	66.56	7925.18	350.975	32995.7
134	Baise	106.618	23.9023	37.49	19.7	37.39	5268.79	173.079	48975.5
135	Hechi	108.085	24.6929	28.9	20.57	21	9795.24	91.5438	26735.9
136	Qinzhou	108.654	21.9799	34.8	23.33	87.57	2664.15	476.589	33468.3
137	Haikou	110.198	20.044	42.36	97.3	123.6	7872.17	904.635	42247
138	Sanya	109.512	18.2528	34.81	19.1	62.4	3060.9	373.489	64740.6
139	Chengdong	104.067	30.5728	40.16	451.85	528.9	8543.2	6481.55	114730
140	Zhongqing	106.552	29.563	41.66	885.05	1114.92	7938.24	9622.81	53664
141	Panzhihua	101.719	26.5823	43.68	56.55	69.38	8150.76	588.942	85714.2
142	泸zhou	105.442	28.8718	39.98	94.78	109.37	8666	587.546	39295.5
143	Mianyang	104.679	31.4675	38.09	82.85	110	7531.82	699.595	55771.3
144	Guangyuan	105.843	32.4354	37.18	35.29	50.43	6997.82	247.886	26517.5
145	Suining	105.593	30.5328	32.51	63.67	75.9	8388.67	299.964	19637.6
146	Neijiang	105.058	29.5802	43.26	60.2	58.01	10377.5	390.758	27369.8
147	Leshan	103.766	29.5521	35.13	48.82	68.01	7178.36	555.997	47881.3
148	Yibin	104.643	28.7518	32.02	57.2	93.52	6116.34	557.907	46387.9
149	Nanchong	106.111	30.8378	41	93	109	8532.11	476.498	24230.8
150	Daxian	107.512	31.1961	42.68	59.49	68	8748.53	183.487	10037
151	Yaan	107.468	31.2096	41.83	24.66	29.2	8445.21	169.816	27083.9
152	Dongmeishan	103.485	29.6012	38.16	30.67	45.2	6785.4	293.883	33702.2
153	Guiyang	106.63	26.6477	36	195.46	299	6537.12	1591.36	67191.2
154	Zunyi	106.927	27.7257	31.19	75.89	63.25	11998.4	443.41	48196.7
155	Anshun	105.948	26.2531	22.88	46.65	40.8	11433.8	167.138	19235.6
156	Kunming	102.833	24.8801	39.29	229.56	407.37	5635.17	2687.86	86859.3
157	Dali	100.268	25.6065	40.91	12.98	23.2	5594.83	83.1077	44971.7
158	Zhaotong	103.717	27.3383	31.14	24.73	37.1	6665.77	187.633	21868.7
159	Yuxi	102.527	24.3473	30	23.9	36.43	6560.53	583.596	117827
160	Baoshan	99.1618	25.112	26.37	26.1	26.5	9849.06	168.001	17815.5
161	Xian	108.94	34.3416	42.2	390.92	424	9219.81	4097.22	62157.3
162	Tongchuan	108.945	34.8968	44.16	39.36	44.12	8921.12	296.135	38975.4
163	Baoji	107.238	34.3632	46.12	77.52	86.34	8978.46	873.887	59222.5
164	Yanan	109.49	36.5854	39.75	28.64	36	7955.56	216.574	46158.1
165	Hanzhong	107.023	33.0675	38.21	38.04	34.1	11155.4	177.142	31176
166	Yulin	109.735	38.2854	28.94	26	52	5000	461.264	76877.3
167	Ankang	109.029	32.6847	40.54	30.55	39	7833.33	187.468	18298.5
168	Lanzhou	103.834	36.0611	33.92	185.77	207	8974.4	1492.8	72670.4
169	Tianshui	105.725	34.5809	34.54	63.6	45.8	13886.5	267.221	21550.1
170	Pingliang	106.665	35.5431	30	28.4	36	7888.89	99.3328	18172.9
171	Wuwei	102.638	37.9283	21.35	31.4	31	10129	237.294	23105.6
172	Zhangye	100.45	38.9259	19.78	18.54	63.1	2938.19	140.536	27088.7
173	Jiuquan	98.4944	39.7328	36.44	23.63	48	4922.92	203.077	43346.3
174	Xining	101.778	36.6171	38.55	116.65	85	13723.5	688.068	52300.7
175	Yinchuan	106.231	38.4872	40.95	103.37	148.61	6955.79	793.901	76801.9
176	Shizuishan	106.383	38.9832	0.39	42.1	102.8	4095.33	322.438	70865.6
177	Wuzhong	106.198	37.9975	39.06	20.32	48	4233.33	113.785	28453.4
178	Wulumuqi	87.6168	43.8256	37.95	256.76	391.2	6563.39	2183.67	85047
179	Kelamayi	84.8892	45.5799	42.89	27.47	63.94	4296.22	853.109	293872
180	Lasa	91.1721	29.6525	28.83	28.14	93.49	3009.95	224.026	67295.4
